# Supplementary material
Source: publisher figshare collection journal article supplement (https://sage.figshare.com/ndownloader/files/22964009)
Supplement: Supplementary file 1 [file 22964009]

## Sheet: Table S1
differentially expressed proteins	logFC	AveExpr	t	P.Value	adj.P.Val	B
Ptbp1	2.27084	-7.64889	17.9752	6.31e-14	1.25e-10	21.7106
Col24a1	1.9608	1.16409	16.3578	3.79e-13	5e-10	20.0681
Kidins220	1.85325	-9.07268	14.893	2.21e-12	2.18e-09	18.4225
Ccl8	1.69111	-4.16364	11.6792	1.86e-10	6.17e-08	14.1721
Cox8a	1.65817	-4.19932	14.0332	6.66e-12	4.39e-09	17.3779
Ctns	1.6574	-0.31588	13.0987	2.36e-11	9.32e-09	16.1693
Cxcl12	1.65125	2.88195	14.2358	5.11e-12	4.04e-09	17.6297
Praf2	1.6485	-1.40469	13.3373	1.7e-11	7.44e-09	16.4855
Igfbp5	1.62173	-0.835835	13.6474	1.11e-11	6.28e-09	16.8886
Ncam1	1.60589	-0.679358	13.3423	1.68e-11	7.44e-09	16.492
Tnc	1.49814	-9.03926	11.1293	4.35e-10	1.23e-07	13.3411
Icam1	1.48059	-0.992468	10.3192	1.62e-09	3.99e-07	12.0538
Tgfbr3	1.44288	-1.13262	11.6736	1.87e-10	6.17e-08	14.1638
Hmgn1	1.33834	-1.58705	11.5215	2.36e-10	7.19e-08	13.9373
Tgfb1i1	1.31081	0.210681	9.2318	1.06e-08	2.09e-06	10.1983
Wasl	1.21425	-5.97582	8.5389	3.77e-08	6.49e-06	8.93501
Col1a1	1.18545	4.49766	9.41812	7.59e-09	1.58e-06	10.527
Ctsk	1.16418	-0.0833697	9.64504	5.1e-09	1.12e-06	10.9212
Igf2r	1.12117	0.419238	7.68917	1.96e-07	2.66e-05	7.2956
Itgb2	1.10143	2.61642	7.98687	1.09e-07	1.59e-05	7.88142
Postn	1.07925	-1.2636	8.24759	6.56e-08	1.08e-05	8.38429
Trp53rka	1.04781	-5.7867	7.43283	3.27e-07	3.81e-05	6.78125
Ube2v2	1.03891	-3.47567	7.67411	2.02e-07	2.66e-05	7.26564
Trp53rkb	1.02279	-5.80097	7.04517	7.26e-07	7.4e-05	5.98603
Smad4	1.01627	-3.78445	8.71362	2.72e-08	4.89e-06	9.2597
Psme1	0.974808	-5.04442	8.19332	7.29e-08	1.11e-05	8.2804
Igtp	0.916279	-4.1662	6.94213	9e-07	8.89e-05	5.77119
Irgq	0.890485	-7.64838	6.78139	1.26e-06	0.000121623	5.43318
Ctgf	0.853681	0.744692	6.16997	4.71e-06	0.000364954	4.11653
Otud7b	0.838985	-7.13772	7.04201	7.31e-07	7.4e-05	5.97947
Ppat	0.811512	-2.13791	5.00404	6.56e-05	0.00319897	1.48998
Cd68	0.786368	3.38327	6.35855	3.12e-06	0.000268167	4.52769
Bmp1	0.772436	-0.844641	4.85897	9.18e-05	0.00421908	1.15547
Gja1	0.767727	-1.72454	6.44626	2.58e-06	0.00023189	4.71742
Oplah	0.744586	-1.03749	5.76357	1.16e-05	0.000804133	3.21625
Trmt112	0.723098	-3.57362	6.26505	3.83e-06	0.000314954	4.32439
Pir	0.719803	-4.53326	5.57355	1.78e-05	0.00109184	2.78917
Mvk	0.707267	-5.00706	5.96924	7.33e-06	0.000536621	3.6742
Pdgfrb	0.691088	-2.4397	5.71663	1.29e-05	0.000863183	3.11108
Rab2a	0.680392	-0.489201	5.61842	1.61e-05	0.00102475	2.89034
Apoe	0.675047	7.00435	5.55112	1.87e-05	0.00112087	2.73851
Gsta4	0.67177	-0.584934	5.69992	1.34e-05	0.000866832	3.07359
Aspscr1	0.670095	-5.78856	5.56945	1.8e-05	0.00109184	2.77991
Cdh11	0.660539	-2.80603	5.18033	4.36e-05	0.00237948	1.89479
Hist1h4m	0.657149	4.50255	5.39389	2.68e-05	0.00153265	2.38217
H2afy	0.646983	0.905189	5.07788	5.53e-05	0.00280057	1.65978
Ogfr	0.644623	0.0347833	4.52371	0.000200925	0.0074911	0.379181
Specc1	0.643473	-2.79757	5.42784	2.48e-05	0.00143939	2.4593
Itgb1	0.640898	2.8375	5.10814	5.15e-05	0.00268033	1.72928
Col1a2	0.635768	3.10553	5.12636	4.94e-05	0.0026395	1.77109
Reps2	0.635479	-4.45542	4.92528	7.87e-05	0.0037473	1.30851
Srd5a3	0.633004	-7.01365	5.07125	5.61e-05	0.00280779	1.64455
Hgd	0.62895	-0.565254	4.95085	7.42e-05	0.00357449	1.36747
Abhd10	0.615292	-1.67961	4.64007	0.000152996	0.00614656	0.648974
Gusb	0.613179	5.35886	4.81367	0.000102022	0.00447989	1.05079
Specc1l	0.608594	-2.27136	4.51277	0.000206143	0.00761382	0.353818
Gns	0.60771	4.73161	4.83799	9.64e-05	0.00437924	1.107
Comp	0.60515	-0.0193319	4.49682	0.000214003	0.00783094	0.316808
H2afx	0.595975	0.670985	5.09293	5.34e-05	0.00274003	1.69436
Hnrnpk	0.593565	-2.058	5.03308	6.13e-05	0.00302845	1.5568
Ctsc	0.590001	3.99964	4.81617	0.000101429	0.00447989	1.05658
Ptges2	0.584603	-3.1849	4.23344	0.000397355	0.0124556	-0.294084
Afg3l1	0.582793	-3.02716	4.78389	0.000109353	0.0046469	0.981934
Prkacb	0.578741	1.80449	4.88142	8.71e-05	0.00409982	1.20731
Clca3a1	0.566515	0.538603	4.55654	0.000186042	0.0070696	0.455332
Cherp	0.560538	-3.22339	4.08674	0.000561163	0.0164275	-0.63375
Nid1	0.547725	-2.0425	4.6288	0.000157086	0.00614656	0.622843
Arf3	0.545383	-4.5003	4.32791	0.000318193	0.0105672	-0.0750334
Pde12	0.544759	-2.60901	4.39243	0.000273429	0.00947885	0.0746319
Smad2	0.543115	-4.44037	4.39553	0.000271443	0.00947885	0.0818288
Klhl9	0.538797	-1.75451	4.59049	0.000171819	0.00665714	0.534061
Dok2	0.531355	-2.98346	3.85941	0.000957727	0.0242096	-1.15794
Myh9	0.527382	4.98718	4.43597	0.000246848	0.00878868	0.175659
Sptan1	0.527167	-4.17377	4.0567	0.000602259	0.0173732	-0.70319
Gnao1	0.523274	-3.45483	3.97472	0.000730357	0.019906	-0.892462
Vdac2	0.520764	2.93759	3.76452	0.00119665	0.0276558	-1.3756
Cd63	0.52006	-0.703218	4.02126	0.000654635	0.0183484	-0.785071
Igf1	0.517129	-3.92474	3.48735	0.00228674	0.0430343	-2.00559
Scrn1	0.515116	-1.0629	4.18423	0.000446131	0.0136675	-0.40811
Fcgr4	0.514519	-1.2608	4.44827	0.000239825	0.00862605	0.204184
Mturn	0.512932	-5.74204	4.44779	0.000240098	0.00862605	0.203061
Psap	0.510871	7.29168	4.08675	0.000561141	0.0164275	-0.633711
Lrch4	0.503993	-2.54287	3.85803	0.000960845	0.0242096	-1.16112
Wdr92	0.503949	-5.84697	4.17289	0.000458195	0.0139291	-0.434376
Igfbp3	0.502463	1.12894	3.62974	0.00164061	0.0348585	-1.68314
Hcfc1	0.498796	0.606111	4.36051	0.000294726	0.00991101	0.00057593
Cd47	0.497192	-0.0495855	3.69098	0.00142166	0.0312133	-1.54366
Clec10a	0.494049	1.4897	3.76608	0.00119227	0.0276558	-1.37202
Smcr8	0.489099	-4.12963	3.88288	0.000906347	0.0233408	-1.10398
Dpy30	0.48878	-3.79009	4.03617	0.00063206	0.0179705	-0.750619
Rab1b	0.48549	1.91563	4.06726	0.000587474	0.0170713	-0.678773
Nup50	0.484469	-1.54859	3.5797	0.00184402	0.0377594	-1.79679
Stom	0.478429	0.334925	3.93177	0.000807963	0.02143	-0.991451
Guf1	0.475928	-4.46255	3.94	0.000792482	0.0211614	-0.972493
Fcho2	0.472112	-5.80414	3.80226	0.00109526	0.025919	-1.28914
Pdlim1	0.469383	2.57437	3.90154	0.000867469	0.0225542	-1.06106
Snrpd1	0.468685	-0.593106	3.9653	0.000746723	0.0202127	-0.914193
Prkar2b	0.467327	1.55988	3.98732	0.000709035	0.0195952	-0.863401
Fyco1	0.462643	-2.44635	3.73017	0.00129699	0.0294577	-1.45418
Cav1	0.461452	2.44584	3.84749	0.000984919	0.0243275	-1.18533
Src	0.460814	-1.60468	3.54578	0.00199582	0.0393797	-1.87361
Fhl1	0.460378	-0.599126	3.90768	0.000855041	0.0225275	-1.04693
Ap2s1	0.457522	0.628386	3.58004	0.00184254	0.0377594	-1.79601
Nhlrc3	0.455278	1.42255	3.82039	0.00104961	0.0252931	-1.24753
Cbr2	0.452463	4.0499	3.85338	0.000971392	0.0242096	-1.1718
Srrm1	0.451769	-1.79402	3.72772	0.00130443	0.0294577	-1.45976
Gpnmb	0.451033	5.3719	3.52942	0.00207341	0.0401303	-1.91063
Isoc2a	0.449028	-3.66118	3.55801	0.0019397	0.0389121	-1.84592
Mlec	0.447301	2.20845	3.6967	0.00140274	0.0311441	-1.53061
Spns1	0.443657	-1.65087	3.50946	0.00217206	0.0414685	-1.95571
Cln3	0.44212	-5.32152	3.12229	0.00530584	0.08223	-2.81637
Sepsecs	0.435549	-1.97917	3.32873	0.00330296	0.0553106	-2.36104
Phldb2	0.432307	-0.970939	3.45545	0.00246271	0.0450585	-2.0774
Crlf3	0.427173	-3.8574	3.44074	0.00254829	0.0461965	-2.11046
Itm2b	0.426654	0.89871	3.499	0.00222554	0.0422853	-1.9793
S100a6	0.424238	5.63235	3.43585	0.00257738	0.0465105	-2.12145
Hexa	0.420996	4.45437	3.67379	0.00148002	0.0317882	-1.58285
Plbd2	0.417992	4.14343	3.38202	0.00292	0.0507856	-2.24211
Mrps17	0.417059	-2.16171	3.48414	0.00230384	0.0431506	-2.01281
Qrsl1	0.414594	-4.05552	3.45597	0.00245975	0.0450585	-2.07623
Arf1	0.414327	-3.07293	3.57457	0.00186621	0.0380168	-1.80841
Col12a1	0.413498	3.50331	3.38756	0.00288279	0.0504106	-2.22972
Lbp	0.412161	-2.4335	3.30354	0.00350071	0.0581294	-2.41708
Ndrg2	0.412072	-2.14253	3.47134	0.00237344	0.0439132	-2.04165
Ints4	0.407325	-3.04327	3.41355	0.00271425	0.0483454	-2.17149
Lrrc8a	0.406859	-2.56775	3.47054	0.00237789	0.0439132	-2.04346
Tmem176b	0.402866	-3.30927	3.27641	0.00372657	0.0613641	-2.47728
Rab4b	0.402386	0.173914	3.08587	0.00576494	0.08865	-2.89572
Tmem104	0.400564	2.14414	3.17436	0.0047106	0.0750657	-2.7024
2310011J03Rik	0.399514	-2.92597	2.8161	0.0105799	0.136194	-3.47226
Wipi2	0.39738	-1.53979	3.42891	0.00261923	0.0470509	-2.13703
Pc	0.395286	2.27082	3.03291	0.00650167	0.0977645	-3.01049
Usp19	0.39486	-2.63047	3.01968	0.00669937	0.0991607	-3.03903
Cpsf4	0.394704	-3.47975	3.37553	0.00296422	0.0511554	-2.25662
Gdpd1	0.391654	0.563322	3.19131	0.00453121	0.0730912	-2.66516
Dhx58	0.390234	-2.00368	3.28993	0.00361231	0.0597315	-2.4473
Wfdc17	0.387872	2.39013	2.90706	0.00863497	0.118828	-3.2802
Vdac1	0.387617	2.80823	2.9127	0.00852627	0.117818	-3.2682
Prdx2	0.386774	2.47195	2.89116	0.00894809	0.121522	-3.31395
Sympk	0.386683	0.309543	3.35339	0.00311996	0.0531468	-2.30606
Cops7b	0.386497	-3.7173	3.33546	0.003252	0.0549226	-2.34604
Ctc1	0.384723	-2.41294	2.86725	0.00943986	0.126035	-3.36458
Gxylt1	0.382729	-1.53139	2.95546	0.00774495	0.109314	-3.17699
Mtx2	0.381603	-1.38945	3.27301	0.00375588	0.0615902	-2.48482
Hist1h1e	0.380833	3.40253	3.16269	0.0048381	0.0767878	-2.728
Rhog	0.379743	2.24948	3.13291	0.00517875	0.0808949	-2.79317
Epn1	0.376962	0.480298	2.95793	0.00770192	0.109314	-3.1717
Prepl	0.375733	-2.34822	3.13971	0.00509903	0.0799658	-2.77832
Cnn2	0.37561	3.3114	2.97379	0.00743152	0.10758	-3.13774
Romo1	0.3739	-1.6084	3.16032	0.00486441	0.0768966	-2.73319
Hmgn2	0.372968	2.39332	3.07046	0.00597045	0.0911012	-2.92917
Dnajc5	0.370797	0.621485	3.05921	0.00612503	0.0931004	-2.95357
Snrpe	0.369302	-1.37647	3.17868	0.00466425	0.0746281	-2.69291
C1qbp	0.365014	-4.56978	2.49344	0.0214042	0.208863	-4.13065
Slc9a9	0.363821	-1.76315	2.96692	0.00754751	0.108683	-3.15246
Stk10	0.363289	-0.413824	3.03892	0.00641364	0.0971139	-2.99749
Mapk7	0.3613	-2.839	2.96066	0.00765479	0.109314	-3.16587
Cycs	0.358573	-0.917864	3.02876	0.0065631	0.0978919	-3.01945
Gnb2	0.35825	2.02601	2.94957	0.00784827	0.110379	-3.18958
F9	0.356464	2.48964	2.95634	0.00772958	0.109314	-3.17511
Npm3	0.35646	-2.33597	3.00225	0.00696892	0.102144	-3.0766
Ctss	0.356095	4.81005	2.53068	0.0197605	0.196709	-4.05669
Lhpp	0.355567	-2.68289	2.85912	0.00961276	0.127482	-3.38174
Suox	0.35537	-0.0308422	2.9574	0.0077112	0.109314	-3.17285
Wdfy1	0.35487	-1.07552	2.83167	0.0102196	0.133005	-3.43957
Dpep1	0.351909	1.35294	2.68674	0.0140786	0.157171	-3.74079
Myl12a	0.351502	-3.41451	2.83116	0.0102311	0.133005	-3.44064
Fam98a	0.34986	-2.23377	3.02694	0.00659009	0.0979099	-3.02336
Asah1	0.349269	3.44886	3.00164	0.00697844	0.102144	-3.0779
Rbbp9	0.348574	-3.16938	2.71358	0.0132725	0.15248	-3.68554
Vamp3	0.347936	-0.561924	2.88398	0.00909313	0.122649	-3.32917
Mrps18b	0.346832	-1.63406	2.59349	0.0172535	0.17991	-3.93066
Eml4	0.345952	-2.40857	2.72175	0.0130359	0.150637	-3.66867
Pfdn5	0.343221	-0.208499	2.96603	0.00756268	0.108683	-3.15437
Fdx1	0.342575	-2.37973	2.7442	0.0124066	0.148579	-3.62221
Lgals1	0.342439	4.93339	2.88737	0.0090245	0.12214	-3.322
Cox7c	0.342388	2.76202	2.76866	0.0117537	0.145158	-3.57138
2310022B05Rik	0.34074	-0.99974	2.56483	0.0183578	0.188933	-3.98836
Igfbp4	0.338318	0.719027	2.58913	0.0174174	0.180665	-3.93946
Hpse	0.336994	2.26136	2.58708	0.017495	0.180996	-3.9436
Hexb	0.335269	4.61409	2.70971	0.0133859	0.153294	-3.69352
Mocs3	0.334496	-3.6696	2.84384	0.00994604	0.131022	-3.41395
Eipr1	0.333835	-1.37874	2.44139	0.0239172	0.220843	-4.23308
Gna11	0.333287	-1.1898	2.69837	0.0137238	0.155208	-3.71688
Ndufa3	0.332965	-1.21077	2.75775	0.0120408	0.146242	-3.59408
Sgcd	0.331782	-2.15038	2.83503	0.0101433	0.132948	-3.4325
Dap	0.330141	0.620418	2.8505	0.00979957	0.129525	-3.39993
Coro1c	0.329545	2.83338	2.82151	0.0104533	0.135097	-3.46091
Plek	0.32925	2.77523	2.77448	0.0116034	0.144474	-3.55927
Pgpep1	0.329001	-2.28771	2.65335	0.0151457	0.165348	-3.80913
Impact	0.328775	-3.44418	2.59731	0.0171114	0.17893	-3.92296
Frmd8	0.32832	-0.471578	2.53345	0.0196431	0.196034	-4.05116
Gnb1	0.326657	1.0581	2.63153	0.0158844	0.170585	-3.8536
Epg5	0.326257	-5.56667	2.50007	0.0211028	0.208495	-4.11753
Mtch2	0.326185	1.1476	2.69516	0.0138206	0.155208	-3.72347
Uqcrh	0.325635	2.3718	2.69446	0.013842	0.155208	-3.72491
Ctsh	0.325006	2.8796	2.80462	0.0108532	0.139259	-3.49632
Endod1	0.323333	-3.15998	2.74745	0.0123178	0.148414	-3.61546
Creg1	0.32298	1.99848	2.62732	0.0160307	0.171225	-3.86216
Bphl	0.322402	1.27119	2.65961	0.01494	0.164007	-3.79635
Idh1	0.320704	5.14269	2.70811	0.013433	0.153294	-3.69681
Srsf10	0.320365	-1.53997	2.48166	0.0219503	0.2114	-4.15393
Glul	0.319489	2.24503	2.58486	0.0175796	0.181395	-3.94808
Rtn3	0.318115	2.1647	2.6083	0.0167079	0.17655	-3.90073
Dynll2	0.317634	-1.03183	2.43125	0.0244378	0.223362	-4.2529
Cyp1b1	0.315965	-1.91682	2.38016	0.0272238	0.236458	-4.35204
Myadm	0.315683	0.436095	2.59188	0.0173138	0.180064	-3.93391
Anxa1	0.315195	5.73058	2.55572	0.0187226	0.1907	-4.00663
Pls3	0.31517	2.85169	2.54519	0.019153	0.192602	-4.02772
Ccl9	0.314509	0.0477742	2.62736	0.0160291	0.171225	-3.86206
Prrc2a	0.314473	-4.32357	2.65562	0.0150709	0.164986	-3.8045
Hebp1	0.314396	1.42553	2.72737	0.0128758	0.150104	-3.65707
Npc1	0.313036	3.07625	2.67757	0.0143642	0.159459	-3.75959
Trpv2	0.311997	0.816689	2.64719	0.0153511	0.167128	-3.82172
Selenbp1	0.311275	1.53194	2.48726	0.0216894	0.210606	-4.14288
Rap2b	0.310669	0.919421	2.56342	0.0184139	0.189018	-3.99119
Atp6v0c	0.310516	2.25124	2.64078	0.0155671	0.16809	-3.83476
Rap1b	0.310427	-0.303431	2.49629	0.0212743	0.208863	-4.12502
Slc4a1ap	0.310062	-2.07311	2.70721	0.0134598	0.153294	-3.69867
Ufl1	0.309724	0.544323	2.46246	0.0228684	0.214161	-4.19175
Gm2a	0.309136	1.66786	2.46659	0.022668	0.213489	-4.18363
Hadha	0.308873	3.64928	2.49406	0.0213759	0.208863	-4.12943
Glrx	0.308131	-1.53247	2.28356	0.0333126	0.262778	-4.53628
Akap9	0.307687	-3.11834	2.50352	0.0209473	0.207478	-4.11069
Trmt6	0.306329	-4.06107	2.40249	0.0259718	0.230136	-4.30886
Inpp1	0.304423	-2.02811	2.45298	0.0233349	0.217318	-4.21037
Slc29a3	0.304368	-1.12797	2.32939	0.0302825	0.250894	-4.44942
Hbs1l	0.304324	-2.41048	2.26742	0.034444	0.267437	-4.56661
Tulp3	0.303563	-1.59187	2.63812	0.0156576	0.168607	-3.84018
Scpep1	0.303311	3.3974	2.45077	0.0234452	0.217501	-4.21471
Gstm1	0.303285	2.39839	2.59723	0.0171143	0.17893	-3.92312
Arhgap10	0.301635	-2.48139	2.56096	0.0185119	0.189531	-3.99612
Rpl24	0.301149	2.63082	2.46617	0.0226886	0.213489	-4.18447
Fcgrt	0.300259	0.226771	2.54048	0.0193482	0.194072	-4.03714
Dram2	0.299478	-1.68708	2.2563	0.0352441	0.269932	-4.58744
Ppt1	0.299141	2.68811	2.40886	0.0256243	0.229926	-4.29649
Npr3	0.299051	0.206749	2.41427	0.0253329	0.228575	-4.28598
Cnot3	0.29829	-1.52484	2.33363	0.0300154	0.249228	-4.44133
Nudt16	0.297925	-0.853985	2.40718	0.0257154	0.229926	-4.29974
Plekhm1	0.297296	-3.22692	2.4339	0.0243008	0.222823	-4.24773
Cnrip1	0.297252	1.45162	2.41164	0.025474	0.229324	-4.29108
Kyat1	0.297142	-2.12609	2.39254	0.0265229	0.233449	-4.32813
Cttn	0.296456	2.75127	2.34524	0.029295	0.247446	-4.41914
Gsto1	0.295082	2.5897	2.29368	0.0326202	0.259909	-4.51718
Snx3	0.294139	1.72337	2.47894	0.0220784	0.2114	-4.1593
Spp2	0.294059	0.636706	2.46619	0.0226873	0.213489	-4.18441
Rpl10	0.291269	-3.14762	2.216	0.0382896	0.282314	-4.66245
Ptdss1	0.291108	-3.06599	2.25392	0.0354178	0.270542	-4.5919
Mcm4	0.290577	-0.141427	2.24648	0.0359656	0.271771	-4.60581
Naglu	0.290106	4.49162	2.16584	0.0424146	0.297203	-4.75464
Rabggtb	0.289927	-2.84916	2.30401	0.0319276	0.256352	-4.49764
Enpp4	0.288876	-2.60256	2.17665	0.0414926	0.294396	-4.73487
Tmem160	0.288392	-0.748053	2.13168	0.0454514	0.306526	-4.81668
Hal	0.288179	4.36733	2.14247	0.0444713	0.305174	-4.79715
Sec16a	0.287602	2.94536	2.46991	0.022508	0.213313	-4.1771
Anxa2	0.287274	3.43455	2.19415	0.0400391	0.288831	-4.70276
Lamp2	0.287196	2.78626	2.46455	0.0227668	0.213715	-4.18764
Wdr45b	0.286076	-0.606898	2.23988	0.0364575	0.272879	-4.61811
Dnajc1	0.286059	-1.93578	2.06348	0.0521086	0.329493	-4.93865
Plin4	0.286053	1.64215	2.47	0.022504	0.213313	-4.17693
Pgam1	0.28516	2.92439	2.24242	0.0362673	0.272582	-4.61338
Vkorc1	0.285105	-1.63598	2.24342	0.0361928	0.272582	-4.61151
Tatdn1	0.284595	-4.03548	2.08057	0.0503628	0.324688	-4.90833
Unc93b1	0.284499	1.98692	2.31818	0.0309994	0.253214	-4.47076
Tor1b	0.284335	-1.73823	2.32148	0.0307868	0.253214	-4.46449
Eif2b1	0.283851	-1.29937	2.24883	0.0357913	0.271492	-4.60141
Cst3	0.283267	3.42602	2.35277	0.0288363	0.247204	-4.40472
Tox4	0.283034	-2.69905	2.25694	0.0351981	0.269932	-4.58626
Abcd4	0.282594	-0.36576	2.14479	0.0442635	0.304871	-4.79295
Grn	0.28214	4.86457	2.20515	0.0391497	0.285988	-4.6825
2020-09-10	0.281739	-3.2906	2.27545	0.0338771	0.265114	-4.55155
Fas	0.281693	-2.51681	2.30323	0.0319791	0.256352	-4.49911
Mgst3	0.27893	-0.0903575	2.24225	0.0362799	0.272582	-4.61369
Galc	0.27888	0.845396	2.31935	0.0309238	0.253214	-4.46854
Plgrkt	0.277754	0.975972	2.30828	0.0316449	0.254706	-4.48954
Gtpbp1	0.277564	-0.360989	2.30946	0.0315675	0.254602	-4.48731
Nipbl	0.277443	-4.56916	2.07703	0.05072	0.325131	-4.91463
Luc7l3	0.27707	-2.05581	2.34618	0.0292375	0.247446	-4.41735
Nek9	0.276977	0.599749	2.23434	0.0368751	0.274531	-4.62842
Maoa	0.275824	2.29046	2.31549	0.0311733	0.253214	-4.47586
Mettl7a1	0.275297	0.681943	2.08613	0.0498058	0.32379	-4.89842
Ctsa	0.274844	3.41521	2.02769	0.0559425	0.339608	-5.00164
S100a10	0.274758	3.56133	2.32095	0.0308207	0.253214	-4.46549
Ube2h	0.274727	-1.43548	2.02947	0.0557456	0.339608	-4.99852
Pygl	0.272365	2.09976	1.87277	0.0755971	0.39187	-5.26566
Cops8	0.271746	-1.11268	2.33516	0.0299196	0.249228	-4.43841
Nfu1	0.271685	-0.442059	2.31247	0.0313703	0.254023	-4.4816
Cryz	0.271497	-0.603411	2.24748	0.0358916	0.271731	-4.60394
Lrrc57	0.270918	1.39768	2.21834	0.0381062	0.282014	-4.65811
Slc31a1	0.270609	-1.66842	2.343	0.0294327	0.247446	-4.42343
Sf3b2	0.270128	1.67898	2.11816	0.0467059	0.311793	-4.84105
Sh3kbp1	0.269781	1.2901	2.31153	0.0314315	0.254023	-4.48338
Tamm41	0.269053	-1.68436	2.32743	0.0304064	0.251393	-4.45315
Tradd	0.268686	0.784949	1.9695	0.062716	0.36183	-5.10247
Gnaq	0.267991	1.14265	2.27175	0.0341375	0.266623	-4.5585
Mtfr1l	0.267906	-3.92151	2.26486	0.0346273	0.268168	-4.57143
Snrpd2	0.267741	2.51058	2.08067	0.0503527	0.324688	-4.90815
Cab39	0.267108	1.37101	2.1962	0.0398724	0.2886	-4.699
Ca3	0.266802	-2.40865	2.21043	0.0387292	0.285024	-4.67276
Gga2	0.26677	-4.14205	2.19961	0.0395956	0.287651	-4.69272
Hk1	0.266739	2.65963	2.12537	0.0460331	0.309323	-4.82807
Serpinb6	0.266487	4.30115	2.26741	0.0344447	0.267437	-4.56663
Taok3	0.266471	-0.63942	2.14743	0.0440277	0.304724	-4.78816
Igfbp7	0.265949	-1.68106	2.26386	0.0346985	0.268168	-4.57329
Rad23b	0.265163	2.26609	2.25334	0.0354607	0.270542	-4.593
Ptpmt1	0.264499	-5.31654	2.06769	0.0516731	0.328315	-4.93119
Cd81	0.26394	-3.72697	2.07663	0.0507606	0.325131	-4.91534
Crbn	0.263653	-2.582	2.13295	0.045335	0.306354	-4.81439
S100a11	0.263172	2.97824	2.2163	0.038266	0.282314	-4.66189
Carhsp1	0.262918	-0.31063	2.04153	0.0544309	0.337694	-4.97737
Fcgr2b	0.262557	1.31117	2.14239	0.0444788	0.305174	-4.7973
Dysf	0.262372	-1.6577	2.10502	0.0479562	0.317913	-4.86466
Rbm42	0.261186	-2.54168	2.1328	0.0453484	0.306354	-4.81465
Stard5	0.260283	-0.571058	2.11449	0.0470519	0.313574	-4.84765
Dbi	0.260229	2.6215	2.26231	0.0348102	0.268168	-4.57621
Hist1h1c	0.260126	2.78924	2.12015	0.0465194	0.311074	-4.83747
Ahcy	0.260077	3.49729	2.00779	0.0581809	0.347328	-5.03633
Auh	0.25826	-1.24519	1.96961	0.0627028	0.36183	-5.10229
Raf1	0.257645	-3.03311	2.0643	0.0520238	0.329484	-4.93721
Khsrp	0.257554	2.46123	2.18124	0.0411071	0.293771	-4.72647
Rdh14	0.257199	-0.32491	2.2206	0.0379303	0.281768	-4.65393
Hnrnpul1	0.25688	1.73618	2.16934	0.0421143	0.296038	-4.74825
Oxct1	0.256785	4.05418	2.20182	0.0394173	0.286883	-4.68865
Ctbs	0.25646	1.78989	2.09003	0.0494188	0.323349	-4.89147
Gng2	0.256366	0.480782	2.02179	0.0565979	0.340603	-5.01195
Sf3b6	0.256225	-1.82549	2.08691	0.0497284	0.32379	-4.89704
Idh3b	0.255922	2.33291	2.15337	0.0435012	0.30267	-4.77736
Adh5	0.255735	2.19168	1.82694	0.0824726	0.408796	-5.34096
Acadsb	0.25556	1.25882	2.14925	0.0438651	0.304131	-4.78484
S100a13	0.255512	3.12853	1.98236	0.0611589	0.359673	-5.08035
Fmo3	0.255268	-1.06663	2.0954	0.0488902	0.321611	-4.88188
Lrmda	0.254256	-1.88273	1.85004	0.0789406	0.40151	-5.30316
Man2b2	0.253932	2.93048	2.08172	0.0502471	0.324688	-4.90628
Prg4	0.253806	0.668692	2.02787	0.0559216	0.339608	-5.00131
Gmfb	0.253637	0.361996	2.15797	0.0430973	0.300389	-4.76898
Ctsb	0.253624	6.3691	2.04325	0.0542458	0.337694	-4.97435
Ttc7a	0.253565	-1.52624	1.88816	0.0734032	0.389042	-5.24007
Gm16286	0.25356	-2.63254	2.18861	0.0404942	0.290799	-4.71295
Pex11b	0.252808	-2.72954	2.06099	0.0523674	0.329548	-4.94306
Hpf1	0.252767	-4.58051	1.7152	0.101558	0.453736	-5.5189
Aldh2	0.252436	4.52957	2.17714	0.0414518	0.294396	-4.73399
Ifi202	0.252344	-0.11475	2.17153	0.0419269	0.296025	-4.74424
Arhgdib	0.251569	1.8797	1.94842	0.0653441	0.371308	-5.13851
Ano6	0.251515	1.32049	1.99582	0.0595667	0.353465	-5.05711
Prdx3	0.250775	2.32093	2.12464	0.046101	0.309323	-4.82939
Uck1	0.250659	-2.62444	2.17882	0.0413104	0.29416	-4.73091
Kras	0.250478	-3.25105	2.14489	0.0442543	0.304871	-4.79276
Col11a1	0.250089	-1.77929	2.02594	0.0561361	0.339739	-5.0047
Tecpr1	0.249963	0.153554	2.13931	0.0447566	0.306207	-4.80288
Stk38	0.249688	-1.1146	1.83332	0.0814833	0.408139	-5.33055
Arhgap22	0.249524	-2.63494	2.053	0.0532059	0.332867	-4.95717
Pxn	0.249245	-0.425846	1.94531	0.0657406	0.371684	-5.14382
Rab8a	0.248927	-0.555148	2.02776	0.0559348	0.339608	-5.00152
Pla2g7	0.246366	4.15386	2.03323	0.055333	0.339608	-4.99194
Mdp1	0.246175	0.582588	2.10658	0.0478061	0.317529	-4.86186
Banf1	0.245702	1.52294	1.95993	0.0638976	0.365446	-5.11887
Samhd1	0.245615	-1.11258	2.02002	0.0567959	0.340603	-5.01504
Lamp1	0.245545	3.47277	1.93392	0.0672086	0.377579	-5.16316
Slc38a7	0.245258	-0.800092	1.9098	0.0704128	0.383294	-5.20385
Ybx1	0.245155	0.968894	1.9031	0.0713279	0.386678	-5.21511
Dnttip2	0.244603	-3.47098	2.09521	0.0489089	0.321611	-4.88222
Timm8b	0.244514	-1.53806	1.86688	0.076451	0.394613	-5.27541
Basp1	0.244196	2.73691	1.92963	0.0677685	0.378278	-5.17041
Decr1	0.244127	1.7039	2.07424	0.0510031	0.326156	-4.91958
Pnpla2	0.24398	-0.997606	1.78798	0.088739	0.428201	-5.40392
Pid1	0.243731	1.41585	2.0295	0.055742	0.339608	-4.99846
Calm2	0.243435	3.54785	2.01806	0.057016	0.340922	-5.01846
Dera	0.243293	-0.00264363	1.93504	0.0670628	0.377579	-5.16126
Psmc6	0.243029	2.98016	1.87858	0.0747619	0.390819	-5.25602
Myo6	0.242793	-1.6144	2.06907	0.0515312	0.327941	-4.92875
Derl2	0.242731	-2.32179	1.9717	0.0624471	0.36183	-5.0987
Fhod1	0.242706	-1.23581	1.70253	0.103944	0.458647	-5.53855
Rnase4	0.242577	-0.432734	1.97347	0.0622313	0.36183	-5.09565
Pnpo	0.242505	-1.03639	1.89288	0.0727414	0.388787	-5.2322
Galk2	0.242195	1.46216	1.9326	0.0673802	0.377579	-5.16539
FRRS1	0.242092	-1.6301	1.93322	0.0672994	0.377579	-5.16434
Nras	0.241892	-1.68955	1.91795	0.069315	0.381619	-5.19013
Supt4h1b	0.241849	-1.20026	2.0773	0.0506928	0.325131	-4.91415
Ccl6	0.241612	1.36932	2.02847	0.0558558	0.339608	-5.00027
Psmf1	0.241238	-1.42385	1.91419	0.0698201	0.38259	-5.19647
Wdr41	0.241059	-1.69434	2.01801	0.0570217	0.340922	-5.01855
Hadh	0.241037	3.01259	1.99625	0.0595164	0.353465	-5.05636
Ist1	0.239125	0.495863	1.85012	0.0789298	0.40151	-5.30304
Hnrnph3	0.239032	-2.12792	1.76813	0.0920891	0.43481	-5.43563
Drg1	0.238754	-0.202736	1.99393	0.0597876	0.354244	-5.06037
Ggact	0.238656	-2.88651	1.90068	0.0716592	0.387475	-5.21914
Vsir	0.238336	0.529557	1.89375	0.0726201	0.388787	-5.23074
Atp5f1d	0.237972	1.69	1.92683	0.0681361	0.379794	-5.17514
Gdap2	0.237263	2.20364	1.82911	0.0821344	0.408796	-5.33742
Stim1	0.237107	-2.666	1.89799	0.0720314	0.387831	-5.22366
Cpsf7	0.236738	-4.56419	1.97244	0.0623562	0.36183	-5.09741
Crip2	0.235744	1.63912	1.80081	0.0866319	0.421637	-5.3833
Dhcr24	0.233953	-0.532379	1.97142	0.0624806	0.36183	-5.09917
Cnpy3	0.233679	0.632284	1.93132	0.0675477	0.377579	-5.16756
Myo10	0.232629	-1.52744	1.9163	0.0695369	0.382211	-5.19292
Tmem167a	0.232341	-2.45974	1.87521	0.0752444	0.39187	-5.2616
Tlr13	0.23121	2.11681	1.8079	0.085486	0.417087	-5.37186
Nt5dc2	0.230506	0.668496	1.72753	0.09928	0.448918	-5.49966
Tspan14	0.230486	-1.99494	1.97613	0.0619089	0.360862	-5.09108
Atg12	0.230468	-1.91085	1.94656	0.0655803	0.371308	-5.14168
Aebp1	0.229944	-0.703679	1.81853	0.0837908	0.412894	-5.35462
Mesd	0.229835	1.55726	1.92103	0.0689045	0.381477	-5.18494
Sirt5	0.229692	-1.60764	1.84512	0.0796826	0.404243	-5.31125
Vps29	0.229518	0.866928	1.69708	0.104985	0.459469	-5.54696
Scamp2	0.22918	0.79377	1.7577	0.0938919	0.439588	-5.45218
Akr1b1	0.228209	2.39799	1.87906	0.0746937	0.390819	-5.25522
Trim3	0.227925	-2.17061	1.81552	0.0842674	0.41421	-5.35951
Dlst	0.227561	2.51699	1.83491	0.0812391	0.408005	-5.32796
Ddah1	0.227324	1.87913	1.96855	0.0628322	0.361972	-5.1041
Ninj1	0.227317	-1.10895	1.91856	0.0692343	0.381619	-5.18911
Rps15	0.227291	0.864866	1.87981	0.0745858	0.390819	-5.25397
Commd2	0.227128	0.666819	1.95298	0.0647671	0.36935	-5.13073
Ak3	0.227119	2.63279	1.67963	0.108379	0.463159	-5.57379
Taf15	0.226177	-1.83852	1.82647	0.0825453	0.408796	-5.34172
Csf1r	0.226025	0.617846	1.89651	0.0722359	0.387876	-5.22613
Ptgr1	0.225978	2.95915	1.53773	0.139579	0.514322	-5.78399
Slc17a5	0.225641	1.0127	1.83779	0.0807975	0.407293	-5.32326
Hypk	0.225585	-1.2632	1.86257	0.0770819	0.396315	-5.28253
Abhd14b	0.22485	-0.86728	1.7753	0.0908661	0.43158	-5.4242
P3h3	0.2246	-3.81198	1.61806	0.121105	0.487878	-5.66674
Cdc23	0.22443	-2.71523	1.82174	0.0832863	0.410921	-5.34942
Lta4h	0.224208	3.11891	1.84578	0.0795819	0.404243	-5.31016
Stk11	0.224043	-0.890331	1.91335	0.0699328	0.38259	-5.19788
Eif4a2	0.224014	0.606052	1.76071	0.0933687	0.438755	-5.44741
Alg1	0.22358	-2.27317	1.71117	0.102311	0.455415	-5.52515
Arpc5l	0.223136	0.71905	1.86424	0.0768362	0.395902	-5.27976
Ufm1	0.222824	0.545412	1.73255	0.0983645	0.446583	-5.4918
Bloc1s2	0.222532	-1.3887	1.60872	0.123142	0.492069	-5.68061
Cnn3	0.221766	1.09951	1.68302	0.107711	0.463159	-5.56859
Hist1h1b	0.221153	1.74605	1.70515	0.103445	0.457801	-5.53448
Cog8	0.221048	-1.68367	1.73182	0.0984981	0.446583	-5.49295
Mme	0.220982	-3.4182	1.80989	0.0851657	0.416238	-5.36863
Gla	0.220651	2.75212	1.87448	0.0753503	0.39187	-5.26282
Suclg2	0.220619	1.07957	1.7447	0.0961826	0.444058	-5.47272
Serping1	0.220326	-2.221	1.74616	0.0959216	0.443371	-5.47041
P4hb	0.220303	5.4786	1.83073	0.0818839	0.408592	-5.33478
Ccar1	0.220154	-0.487922	1.77977	0.0901123	0.431143	-5.41707
Actr3	0.220056	3.45724	1.81405	0.0845021	0.414847	-5.3619
Tspan31	0.219978	-1.0719	1.67846	0.10861	0.463159	-5.57558
Naxe	0.219848	0.97105	1.89247	0.0727992	0.388787	-5.23289
Pdcd6	0.219784	1.69288	1.86233	0.0771169	0.396315	-5.28292
Picalm	0.21976	-2.36561	1.65382	0.113568	0.472443	-5.61307
Wdr82	0.218837	-1.03909	1.65295	0.113748	0.472556	-5.6144
Ahnak	0.218191	7.31767	1.62069	0.120537	0.487878	-5.66283
Pgm2l1	0.217664	0.87804	1.68703	0.106928	0.461834	-5.56244
Slc37a2	0.217499	0.328446	1.76372	0.0928478	0.436827	-5.44264
Lamtor1	0.21727	0.926765	1.88652	0.0736344	0.389042	-5.24281
Ostf1	0.216795	2.47267	1.69708	0.104985	0.459469	-5.54697
Trappc11	0.216579	-1.28086	1.82749	0.0823865	0.408796	-5.34006
Plekha2	0.216081	-1.82294	1.78033	0.0900184	0.431143	-5.41618
Fam213b	0.215966	1.33802	1.63234	0.118046	0.481903	-5.64542
Ap2a2	0.215645	3.48118	1.81109	0.0849743	0.416132	-5.3667
Osgep	0.215247	-0.801105	1.6991	0.104598	0.459301	-5.54385
Pdia3	0.214676	5.1676	1.79743	0.0871821	0.422437	-5.38874
Nbas	0.214185	-1.73707	1.7645	0.0927132	0.436713	-5.4414
Casp9	0.213532	-1.97433	1.73166	0.0985268	0.446583	-5.4932
Heatr3	0.21345	-4.98542	1.68762	0.106813	0.461834	-5.56153
Ndufa6	0.213286	0.933031	1.74708	0.0957593	0.443139	-5.46897
Bgn	0.213217	-0.0038453	1.75684	0.0940427	0.439588	-5.45355
S100a4	0.213205	4.02877	1.56595	0.132839	0.505015	-5.74333
Mrto4	0.211947	-1.35032	1.76597	0.0924604	0.436042	-5.43907
Spg21	0.211378	1.40378	1.8444	0.0797902	0.40427	-5.31242
Acbd5	0.211252	-1.18644	1.67363	0.109566	0.464101	-5.58296
Slc40a1	0.211147	-0.167397	1.7989	0.0869434	0.422437	-5.38638
Poldip3	0.210901	-1.47936	1.72254	0.100196	0.450996	-5.50745
Acsl3	0.209936	-7.69909	1.53455	0.140356	0.51453	-5.78853
Lyz2	0.209743	1.94957	1.72066	0.100543	0.452043	-5.51039
Slc35f6	0.209586	0.750414	1.78866	0.0886266	0.428181	-5.40283
G6pdx	0.209101	3.99238	1.59857	0.125388	0.495039	-5.69562
Epb41l1	0.209094	0.0875175	1.67863	0.108576	0.463159	-5.57532
Polr2l	0.208742	-3.72341	1.60061	0.124934	0.494577	-5.69261
Glmp	0.208351	1.97485	1.75958	0.0935644	0.439062	-5.4492
Trpv4	0.207931	0.200293	1.558	0.13471	0.506059	-5.75484
Ada	0.207855	3.60393	1.63838	0.116774	0.477732	-5.63637
Hspb1	0.207855	2.93519	1.77156	0.0915023	0.433286	-5.43017
Snap29	0.207791	0.777218	1.57474	0.130795	0.503819	-5.73054
Ppp3ca	0.207702	0.16698	1.71878	0.100891	0.453094	-5.51332
Sorbs1	0.207417	-2.2929	1.7316	0.0985376	0.446583	-5.49329
Xpo7	0.207377	-1.33923	1.67604	0.109088	0.463567	-5.57928
Fmr1	0.207299	-1.12993	1.67158	0.109974	0.464765	-5.58608
Ptpre	0.206817	-2.16889	1.7039	0.103684	0.458343	-5.53643
Stx12	0.206688	1.9959	1.54175	0.138602	0.513166	-5.77823
Numbl	0.206572	-2.91489	1.74216	0.0966341	0.444584	-5.47671
Adap2	0.206431	-0.953649	1.6587	0.112572	0.469286	-5.60569
Clip2	0.206429	-3.35783	1.52938	0.141628	0.51634	-5.79591
Pcdhgc3	0.206299	-1.65098	1.5194	0.144107	0.519653	-5.81009
Bub3	0.206233	0.977733	1.6906	0.106234	0.461301	-5.55695
Me1	0.206163	1.02275	1.55662	0.135037	0.506394	-5.75684
Mrpl48	0.205922	-2.1423	1.64429	0.115537	0.474704	-5.62746
Ifi207	0.205192	0.717306	1.51786	0.144492	0.519664	-5.81226
Exoc1	0.204976	0.285587	1.48499	0.152933	0.53015	-5.8584
Vkorc1l1	0.20424	-1.28531	1.56065	0.134085	0.505151	-5.75102
Lyn	0.203793	0.985255	1.71501	0.101593	0.453736	-5.51919
Lin7c	0.203768	-1.69416	1.60383	0.12422	0.494376	-5.68785
Capza1	0.203231	2.0652	1.64158	0.116102	0.475971	-5.63155
Rragc	0.203089	0.616631	1.56211	0.133741	0.505015	-5.74891
Chid1	0.202882	-0.059271	1.58364	0.128753	0.502798	-5.71755
Sucla2	0.202795	2.19939	1.52033	0.143875	0.519653	-5.80877
Trappc3	0.202056	1.27655	1.51442	0.145358	0.520147	-5.81713
Rps6ka4	0.202041	-2.10113	1.57036	0.13181	0.504761	-5.73692
Prdx5	0.201712	3.22328	1.67985	0.108336	0.463159	-5.57346
Nubp2	0.201557	-0.385438	1.612	0.122424	0.490273	-5.67575
Ppp2r5e	0.201264	-1.81662	1.5767	0.130343	0.503819	-5.72769
Kpnb1	0.201139	3.87833	1.59676	0.125792	0.495643	-5.69828
Arsb	0.200736	2.63778	1.54758	0.137196	0.511989	-5.76987
Hk2	0.200701	2.3517	1.63674	0.117119	0.478648	-5.63883
Eif1	0.20067	-2.18839	1.65089	0.11417	0.472957	-5.61751
Ube2l3	0.200553	1.32182	1.6067	0.123587	0.492355	-5.68361
Hadhb	0.200288	3.00792	1.70109	0.104217	0.458647	-5.54076
Ftsj3	0.200228	-2.74641	1.5714	0.131569	0.504761	-5.73541
Smagp	0.200155	-2.35206	1.68449	0.107423	0.462961	-5.56633
Rab1a	0.199597	2.14028	1.58297	0.128907	0.502903	-5.71853
Ifi30	0.199362	1.10425	1.5866	0.128082	0.501665	-5.71322
Gas6	0.199157	3.73858	1.65021	0.11431	0.473042	-5.61853
Sparcl1	0.19911	-3.10364	1.543	0.1383	0.513166	-5.77644
Ttc39b	0.198852	-2.52047	1.56412	0.133269	0.505015	-5.74599
Gnpda2	0.198728	-1.15827	1.60909	0.123062	0.492069	-5.68007
Ehd3	0.198701	0.523114	1.6003	0.125004	0.494577	-5.69307
Kctd12b	0.19857	-1.14143	1.66748	0.110796	0.466309	-5.59234
Rcc1	0.198549	0.225257	1.55848	0.134595	0.506059	-5.75415
Vat1	0.198283	4.06658	1.47508	0.155556	0.532079	-5.87215
Prpf38b	0.198166	-0.954621	1.44312	0.164262	0.54052	-5.91598
Oxr1	0.198111	2.09345	1.55146	0.136266	0.509482	-5.76428
Nat10	0.197981	-1.95067	1.57279	0.131247	0.504559	-5.73339
Tpst2	0.197682	-3.6451	1.68133	0.108044	0.463159	-5.57119
Rae1	0.19759	-0.0357527	1.42779	0.168578	0.547362	-5.93674
Casp3	0.197321	-0.112192	1.4906	0.151465	0.53015	-5.85059
Timm8a1	0.197187	-1.3776	1.68151	0.108009	0.463159	-5.57091
Mxra8	0.197162	-2.00902	1.46807	0.157432	0.534455	-5.88183
Calu	0.19706	0.102852	1.53373	0.140556	0.51453	-5.7897
Tbcc	0.197042	-1.06067	1.55267	0.135975	0.508878	-5.76253
Snrpc	0.196672	-0.199187	1.71492	0.101608	0.453736	-5.51932
Tpm4	0.19597	4.13578	1.53938	0.139178	0.514322	-5.78163
Tkt	0.195961	4.46833	1.26421	0.2205	0.61238	-6.14668
Blvra	0.195734	2.64124	1.68498	0.107328	0.462961	-5.56558
Chmp3	0.195349	1.42394	1.64756	0.114858	0.473818	-5.62253
Ndufs5	0.19531	-0.147593	1.6783	0.108641	0.463159	-5.57582
Naga	0.194979	4.31085	1.50628	0.147422	0.524404	-5.82862
Zeb2	0.19489	-1.78001	1.51411	0.145436	0.520147	-5.81757
Wdr12	0.194651	-2.24327	1.62696	0.119192	0.485614	-5.65347
Rab10	0.194497	3.15048	1.37105	0.185349	0.5741	-6.01196
Tjap1	0.194488	-5.76272	1.31707	0.20251	0.593106	-6.08117
Mbnl1	0.194298	-0.86786	1.42932	0.168144	0.546701	-5.93468
Aldh6a1	0.194127	2.31526	1.53375	0.140553	0.51453	-5.78968
Wipf1	0.193962	-0.0659944	1.48755	0.152261	0.53015	-5.85483
Parp3	0.193665	1.44811	1.50228	0.148444	0.526144	-5.83423
Mst1	0.193604	0.441899	1.39184	0.179057	0.567923	-5.98469
Col3a1	0.193546	-5.36682	1.41968	0.170899	0.550699	-5.94765
Pros1	0.193263	0.687827	1.56266	0.133612	0.505015	-5.74811
Gcdh	0.193235	-0.493863	1.6649	0.111315	0.467999	-5.59627
Aqp1	0.193127	-0.600078	1.67748	0.108802	0.463348	-5.57708
Myo1c	0.192941	4.17276	1.48649	0.152539	0.53015	-5.85631
Aldh1a1	0.192545	-0.555618	1.51449	0.145341	0.520147	-5.81704
Lsp1	0.192239	-2.18944	1.38804	0.180194	0.569951	-5.9897
Rnaseh2a	0.191949	-2.17812	1.5718	0.131477	0.504761	-5.73484
Gmfg	0.191708	0.234293	1.61479	0.121816	0.489742	-5.67161
Trmt10c	0.191573	-3.11837	1.49713	0.14977	0.528473	-5.84145
Slc25a5	0.191368	3.46684	1.5189	0.144232	0.519653	-5.81079
Gpld1	0.19131	-1.98602	1.64682	0.115012	0.47396	-5.62366
Ndufb6	0.191287	-0.662823	1.45502	0.160976	0.538547	-5.89976
Tubb5	0.190353	1.8378	1.59888	0.125319	0.495039	-5.69516
Pi4k2a	0.189844	1.0977	1.59558	0.126057	0.495698	-5.70003
Ccs	0.189006	-2.80912	1.40324	0.175679	0.562171	-5.96959
Chmp2b	0.188955	-1.10338	1.53222	0.140927	0.514735	-5.79186
Cd302	0.188513	-2.39445	1.60695	0.123533	0.492355	-5.68324
F13a1	0.188476	4.78106	1.61912	0.120876	0.487878	-5.66517
Tgfbi	0.188434	1.24767	1.46122	0.159285	0.536197	-5.89126
Tmed9	0.188431	1.34164	1.4523	0.161723	0.538548	-5.90348
Fmo1	0.188286	0.836209	1.46056	0.159464	0.536342	-5.89216
Pnkp	0.18817	-1.073	1.43614	0.166218	0.544237	-5.92546
Pcbp1	0.188005	2.72223	1.61294	0.122219	0.490273	-5.67436
Vamp8	0.187802	1.43022	1.26776	0.219254	0.610205	-6.14234
Adap1	0.187667	-3.33776	1.36535	0.187106	0.5741	-6.01938
Calm3	0.186824	3.52845	1.56746	0.132486	0.505015	-5.74114
Ralb	0.186193	0.0968008	1.50871	0.146803	0.523114	-5.82519
Thyn1	0.186147	-0.555477	1.61879	0.120949	0.487878	-5.66567
Hs1bp3	0.186124	1.01145	1.30023	0.208113	0.600338	-6.10228
Anks1	0.185816	-0.49265	1.54184	0.138581	0.513166	-5.77811
Srsf1	0.185712	2.37244	1.34287	0.194158	0.584841	-6.04837
Chtop	0.185709	-0.697898	1.49433	0.150495	0.529142	-5.84537
2020-09-09	0.185546	2.64872	1.56303	0.133525	0.505015	-5.74757
Rpl36a	0.185462	0.248034	1.58043	0.129487	0.503638	-5.72224
Pcyt2	0.185036	-2.59625	1.2282	0.233442	0.629762	-6.18998
Gbf1	0.185006	-0.909613	1.45189	0.161836	0.538548	-5.90404
Cyb5r3	0.184892	3.71928	1.48571	0.152744	0.53015	-5.8574
Psmg2	0.184588	-1.77135	1.5797	0.129655	0.503638	-5.72331
Maob	0.184554	-0.790211	1.60022	0.125021	0.494577	-5.69318
Nelfa	0.184271	-2.99907	1.58498	0.128449	0.502606	-5.71559
Dpp7	0.184265	3.43047	1.60289	0.124428	0.494577	-5.68924
Gltp	0.184226	2.04652	1.56181	0.133812	0.505015	-5.74934
Lmcd1	0.184214	0.0512471	1.57085	0.131696	0.504761	-5.73621
Atp9b	0.184033	-2.1508	1.4783	0.1547	0.531526	-5.8677
Uvrag	0.183996	-3.00372	1.37584	0.183883	0.5741	-6.0057
Mbnl2	0.183781	-0.381343	1.40092	0.176361	0.563898	-5.97267
Scaf4	0.183768	-1.85994	1.37906	0.182905	0.573227	-6.0015
Braf	0.183738	-1.59256	1.48381	0.153244	0.53015	-5.86004
Mapk3	0.183644	1.58266	1.50885	0.146767	0.523114	-5.82499
Psmb5	0.183613	1.00698	1.43057	0.167789	0.546701	-5.93299
Acadm	0.183343	1.17835	1.43788	0.165727	0.543873	-5.9231
Ivd	0.183122	0.922181	1.31424	0.203444	0.593106	-6.08473
Map1b	0.18298	-1.42188	1.58091	0.129376	0.503638	-5.72154
2020-09-11	0.181775	1.30104	1.4455	0.163602	0.54052	-5.91275
Atp5mf	0.181677	-0.399361	1.33215	0.197597	0.58799	-6.06207
Golgb1	0.180537	1.76545	1.38058	0.182444	0.572237	-5.9995
Lman2	0.180165	2.43201	1.46666	0.157812	0.534455	-5.88377
Hspa8	0.179938	5.2627	1.52706	0.142201	0.517952	-5.79921
Macrod1	0.17983	-0.23135	1.42907	0.168216	0.546701	-5.93502
Carm1	0.179736	-0.650238	1.23001	0.23278	0.629762	-6.18784
Dek	0.178968	0.730568	1.41422	0.172474	0.554613	-5.95496
Sh3glb2	0.178735	-1.90737	1.42655	0.168931	0.547362	-5.93841
Actbl2	0.178595	-0.956745	1.28494	0.213304	0.605846	-6.12126
Gbp7	0.178327	0.811172	1.42204	0.170219	0.549212	-5.94447
Armh3	0.177588	-1.59307	1.47174	0.156449	0.534336	-5.87677
Crip1	0.177255	2.76577	1.42627	0.169011	0.547362	-5.93879
Fmn1	0.176985	-2.22591	1.33313	0.197279	0.58799	-6.06082
Hyi	0.17663	0.506559	1.47067	0.156733	0.534336	-5.87824
Itm2c	0.176458	-0.776507	1.36405	0.187507	0.574439	-6.02106
Nr2c2ap	0.176195	-2.97196	1.50347	0.14814	0.525538	-5.83256
Ovca2	0.176037	-1.79394	1.32399	0.200243	0.591008	-6.07242
Epn2	0.175951	-3.42105	1.37494	0.18416	0.5741	-6.00689
Tldc1	0.175737	-2.23889	1.35369	0.190737	0.57895	-6.03447
Ppp2r5d	0.175661	0.609669	1.52545	0.142599	0.518416	-5.8015
Hsd17b8	0.17557	-0.385713	1.39363	0.178521	0.567136	-5.98232
Comt	0.175569	2.22416	1.45215	0.161763	0.538548	-5.90368
Thbs2	0.175514	-1.74671	1.34523	0.19341	0.583478	-6.04536
Gstk1	0.17517	-0.0762175	1.34989	0.191935	0.580412	-6.03937
Ccdc25	0.175127	-1.43167	1.29777	0.208942	0.601141	-6.10535
Hibch	0.174996	-0.534748	1.47874	0.154583	0.531526	-5.86708
Arpc1a	0.174993	-0.264025	1.50482	0.147795	0.524785	-5.83067
Ccdc58	0.174686	-1.88715	1.455	0.160982	0.538547	-5.89979
Tbc1d9b	0.174614	1.10103	1.29678	0.209277	0.601141	-6.10659
Arih2	0.174553	-2.32054	1.25856	0.222493	0.615711	-6.15354
Tomm40	0.174268	-0.939095	1.4254	0.169258	0.547362	-5.93995
Apobr	0.17416	1.90465	1.44823	0.162846	0.539905	-5.90903
Actn1	0.174055	-0.711103	1.39579	0.17788	0.566007	-5.97947
Mrc1	0.17372	5.48921	1.38083	0.182369	0.572237	-5.99918
Glo1	0.173408	1.67527	1.38496	0.181119	0.570737	-5.99375
Ftl1	0.17334	2.93981	1.49279	0.150894	0.529325	-5.84752
Vps37b	0.173289	-2.40512	1.47583	0.155356	0.532035	-5.87112
Urod	0.173069	0.939181	1.44535	0.163643	0.54052	-5.91295
Blvrb	0.173047	3.24373	1.4119	0.173147	0.55542	-5.95806
Etfa	0.172957	3.1256	1.45803	0.160154	0.537804	-5.89564
Htra1	0.172899	2.35964	1.34357	0.193937	0.584621	-6.04749
Nans	0.17234	3.12294	1.31308	0.203827	0.59317	-6.08619
Stx7	0.171923	2.35687	1.47028	0.15684	0.534336	-5.87879
Fth1	0.171892	3.46189	1.45417	0.16121	0.538547	-5.90092
Fis1	0.171153	-0.0741215	1.44914	0.162593	0.539798	-5.90779
Sec24c	0.171089	1.73996	1.47823	0.154718	0.531526	-5.86779
Hdgf	0.170793	1.745	1.38237	0.181902	0.5719	-5.99716
Por	0.170786	4.10277	1.33658	0.19617	0.587321	-6.05642
Nol3	0.17074	-1.95661	1.46176	0.159138	0.536197	-5.89051
Cnp	0.170469	-1.07414	1.23902	0.229494	0.626354	-6.17708
Ap1g2	0.170383	-1.56628	1.26376	0.220658	0.612388	-6.14722
Lrrc47	0.170378	1.42971	1.3354	0.196548	0.587561	-6.05792
Psmb1	0.170199	2.19403	1.192	0.247029	0.64101	-6.23243
Znf326	0.170058	-2.77012	1.37498	0.184147	0.5741	-6.00683
Pex19	0.169909	-1.23475	1.33994	0.195094	0.586602	-6.05213
Fam162a	0.169909	-0.942648	1.3692	0.185918	0.5741	-6.01437
Snx8	0.169901	0.391319	1.25988	0.222025	0.614887	-6.15194
Cs	0.169877	4.08153	1.35378	0.19071	0.57895	-6.03436
Lmna	0.169624	5.33499	1.43203	0.167377	0.546673	-5.93102
Bcl2l1	0.169606	-0.25593	1.35863	0.189194	0.577344	-6.0281
Acss2	0.169362	-0.933028	1.45121	0.162023	0.538548	-5.90496
Scarb2	0.169212	1.98176	1.29054	0.21139	0.604398	-6.11433
Myof	0.168765	4.74798	1.44341	0.164183	0.54052	-5.91559
Glod4	0.168423	2.41478	1.28467	0.213395	0.605846	-6.12159
Supt4h1a	0.168396	-1.25875	1.2411	0.22874	0.62516	-6.17459
Comtd1	0.168296	0.956938	1.25511	0.223718	0.617843	-6.15772
Epb41l3	0.168268	0.0173918	1.29976	0.20827	0.600354	-6.10287
Gsk3a	0.168179	-1.97865	1.29559	0.209676	0.601141	-6.10806
Lypla1	0.167986	1.05231	1.45119	0.162028	0.538548	-5.90499
Xrcc5	0.167584	-3.55877	1.39238	0.178894	0.567864	-5.98397
Gatd3a	0.167507	2.72494	1.44884	0.162677	0.539798	-5.9082
Csad	0.167456	-1.13841	1.3695	0.185827	0.5741	-6.01398
Gpc4	0.167449	-1.40538	1.28944	0.211765	0.604692	-6.11569
Ergic1	0.166997	1.02894	1.36971	0.185761	0.5741	-6.01371
C3ar1	0.166955	-0.0775465	1.33004	0.198277	0.58799	-6.06475
Eef1a1	0.16644	6.00003	1.33122	0.197896	0.58799	-6.06325
C1qc	0.166324	1.23281	1.19507	0.245855	0.640567	-6.22888
Rab29	0.1661	-3.08044	1.43337	0.166998	0.545886	-5.92921
Man2a2	0.165426	-1.29199	1.44455	0.163865	0.54052	-5.91404
Agfg2	0.16519	-4.39912	1.35786	0.189431	0.577344	-6.02908
Bag2	0.165149	-5.54793	1.3144	0.203391	0.593106	-6.08453
Lonp2	0.164998	-3.26387	1.32972	0.198381	0.58799	-6.06516
Uevld	0.164869	-1.98753	1.42198	0.170239	0.549212	-5.94456
2020-09-02	0.164745	3.07389	1.28477	0.213362	0.605846	-6.12147
Tln1	0.164399	6.13771	1.42495	0.169389	0.547362	-5.94057
Bak1	0.164373	-1.19284	1.39597	0.177828	0.566007	-5.97924
Vdac3	0.163662	2.7115	1.23965	0.229266	0.626163	-6.17633
Gbe1	0.163415	-0.84653	1.19512	0.245835	0.640567	-6.22882
Stt3a	0.163251	2.54579	1.3857	0.180896	0.570737	-5.99278
Ndufa8	0.16293	2.02379	1.32806	0.198919	0.588181	-6.06727
C1qa	0.162376	1.09477	1.30976	0.204927	0.593782	-6.09036
Ppib	0.162243	3.42243	1.36414	0.18748	0.574439	-6.02095
Nqo2	0.162178	1.22177	1.31389	0.203561	0.593106	-6.08518
Ube2i	0.161991	0.99371	1.28757	0.212404	0.60504	-6.11801
Gosr1	0.161969	-2.69251	1.25725	0.222957	0.616171	-6.15513
S100a1	0.161819	-0.808545	1.3007	0.207956	0.600323	-6.1017
Pacs1	0.161731	-1.58611	1.19057	0.247578	0.642013	-6.23409
Dennd4b	0.161671	-5.35554	1.36786	0.18633	0.5741	-6.01611
Rab7a	0.161542	4.39353	1.39595	0.177833	0.566007	-5.97926
Gstp1	0.161508	1.70163	1.24624	0.226889	0.622685	-6.16842
Chordc1	0.161098	-0.838735	1.36554	0.187046	0.5741	-6.01913
Tbc1d2	0.160821	-5.29987	1.23112	0.232371	0.629762	-6.18651
Rap2a	0.160811	-3.38267	1.34895	0.19223	0.580412	-6.04057
Ids	0.16076	-0.646578	1.24918	0.225834	0.620652	-6.16488
Fam105a	0.160527	-1.98146	1.2829	0.214004	0.606012	-6.12378
Aida	0.160225	-1.41218	1.05254	0.30494	0.68943	-6.38554
Pdcd4	0.16012	-2.46958	1.20421	0.242383	0.638011	-6.21824
Slc1a5	0.160008	0.758319	1.26915	0.218766	0.609514	-6.14064
Ndufs8	0.159839	0.550598	1.25341	0.224323	0.618808	-6.15978
4931406C07Rik	0.15953	1.71256	1.3033	0.207083	0.598241	-6.09845
Slc25a1	0.159473	2.05345	1.32785	0.198987	0.588181	-6.06753
Chmp6	0.159411	-4.61546	1.1026	0.283119	0.673221	-6.33251
Zbed5	0.159372	-2.71864	1.27076	0.218204	0.608998	-6.13867
Ly6c1	0.158881	-2.03105	1.28579	0.213013	0.605846	-6.12021
Cog1	0.158535	-3.39135	1.36768	0.186387	0.5741	-6.01635
Sult1a1	0.158522	2.18843	1.23552	0.230766	0.628218	-6.18127
Fgd2	0.158376	-1.49751	1.16702	0.256748	0.65009	-6.26109
Zc3h11a	0.158165	-3.6941	1.1516	0.262889	0.653009	-6.27851
Cog6	0.158006	-1.36955	1.29601	0.209535	0.601141	-6.10754
Lxn	0.157925	0.878396	1.32317	0.200513	0.591363	-6.07347
Kdsr	0.15729	-0.189528	1.32685	0.199314	0.588706	-6.06881
Rbmxl1	0.156908	2.46457	1.34935	0.192105	0.580412	-6.04006
Ugt1a6	0.15646	-1.39441	1.32949	0.198457	0.58799	-6.06546
Pofut2	0.156381	-0.0144062	1.22864	0.233282	0.629762	-6.18946
Pqlc3	0.156356	-2.68394	1.21087	0.239876	0.63737	-6.21045
Rwdd1	0.1561	-0.0965454	1.17928	0.251945	0.648439	-6.2471
Cdk2	0.156045	-5.20257	1.3174	0.202404	0.593106	-6.08076
Cfl2	0.155903	0.677971	1.27655	0.216193	0.607061	-6.13158
Atp13a2	0.155868	-1.30938	1.22103	0.236089	0.632557	-6.19848
Mt2	0.15585	-3.33259	1.349	0.192214	0.580412	-6.04051
Washc2	0.155781	2.22671	1.3136	0.203655	0.593106	-6.08554
Arhgdia	0.155611	4.54785	1.22833	0.233395	0.629762	-6.18983
Ndufa7	0.155449	1.43863	1.15375	0.262025	0.652502	-6.27609
Dcun1d1	0.155427	-1.81804	1.17265	0.254533	0.649316	-6.25467
Iws1	0.155413	-2.00225	1.33909	0.195366	0.586602	-6.05322
Ap3d1	0.155409	2.13026	1.17342	0.254233	0.649147	-6.2538
Pccb	0.155304	1.19277	1.26131	0.221522	0.613922	-6.1502
Nipsnap3b	0.154351	0.0375636	1.31826	0.20212	0.593106	-6.07967
Me2	0.154103	1.14922	1.31187	0.204228	0.59338	-6.08771
Calr	0.153899	5.88656	1.20767	0.241079	0.637574	-6.2142
Rps12	0.153888	1.88194	1.13069	0.271387	0.660827	-6.30181
Rnpep	0.153403	3.13918	1.26891	0.218851	0.609514	-6.14094
Cops3	0.153401	0.406511	1.24131	0.228663	0.62516	-6.17433
Akr1c13	0.153105	0.0245649	1.2496	0.225682	0.620652	-6.16437
Stam	0.152922	-1.32752	1.3079	0.205547	0.594236	-6.0927
Tmem9b	0.152841	0.0650127	1.1825	0.250693	0.648072	-6.24339
Cdk4	0.152619	-0.963414	1.31252	0.204012	0.593272	-6.08689
Arpc2	0.152172	4.89196	1.16184	0.258799	0.651034	-6.26696
Commd3	0.151942	-0.654319	1.23058	0.232571	0.629762	-6.18716
Aldh9a1	0.151933	3.00117	1.08828	0.289241	0.678195	-6.3479
Cdc5l	0.151804	-3.12608	1.21678	0.237666	0.634745	-6.20349
Bet1l	0.151773	-1.77793	1.16422	0.257854	0.651034	-6.26426
Rbm39	0.151309	1.18974	1.20562	0.241851	0.637574	-6.21659
Grpel1	0.151281	1.22584	1.22002	0.236461	0.633125	-6.19967
Pttg1ip	0.151208	0.78588	1.18534	0.249595	0.646396	-6.24013
Calm1	0.150964	3.46862	1.28009	0.214969	0.606394	-6.12723
Cast	0.150445	1.76389	1.17823	0.252353	0.648439	-6.2483
Cavin2	0.150197	1.24686	1.27138	0.217988	0.608998	-6.13792
Bcl2l13	0.150188	-0.851996	1.12859	0.272252	0.662525	-6.30413
Abcb6	0.149884	-1.17487	1.25248	0.224654	0.618808	-6.1609
Crlf1	0.149405	-1.51307	1.20716	0.241271	0.637574	-6.2148
Gnas	0.149345	1.22929	1.27467	0.216843	0.607749	-6.13389
Lemd3	0.149192	-0.924595	1.20126	0.243501	0.638563	-6.22169
Hint2	0.148969	0.905065	1.16794	0.256384	0.65009	-6.26004
Rars2	0.148531	-1.88241	1.1715	0.254983	0.649316	-6.25598
Pgls	0.148316	2.80757	1.18019	0.251588	0.648439	-6.24604
Gpd1l	0.14819	0.78867	1.19324	0.246556	0.64101	-6.231
Cnpy4	0.148074	0.545363	1.14181	0.266844	0.657461	-6.28947
Vps13c	0.147987	2.96377	1.28729	0.212499	0.60504	-6.11835
Ppm1h	0.147568	-0.968395	1.12789	0.272542	0.662822	-6.3049
Cndp2	0.147556	4.41811	1.21796	0.237228	0.634711	-6.2021
Atp5pd	0.147522	2.57879	1.17384	0.254068	0.649147	-6.25332
Loxl2	0.147149	0.155916	1.22233	0.235605	0.632373	-6.19694
Myl9	0.147121	0.553552	1.15487	0.261578	0.652436	-6.27483
Rbm22	0.146851	-0.00484825	1.12025	0.275704	0.665598	-6.3133
Rps6ka1	0.146306	-1.81468	1.09031	0.288367	0.677139	-6.34573
Acp2	0.146252	2.51205	1.20944	0.240412	0.637452	-6.21212
Tpm2	0.146091	1.74816	1.07028	0.297073	0.681896	-6.367
Tsg101	0.145906	0.446883	1.20693	0.241355	0.637574	-6.21506
Mical1	0.145788	-1.20026	1.22194	0.235752	0.632373	-6.19741
Slc39a7	0.145641	0.132605	1.07765	0.29385	0.681896	-6.35922
Abcf2	0.145529	2.52242	1.14368	0.266083	0.657461	-6.28738
Zmat2	0.145305	-1.6623	1.26245	0.22112	0.61324	-6.14882
Pcyox1l	0.14517	-2.85046	1.07762	0.293862	0.681896	-6.35925
Cybb	0.145118	3.17633	1.20921	0.240496	0.637452	-6.21238
Abi1	0.144929	1.94529	1.10023	0.284125	0.673583	-6.33507
Rab43	0.144736	-2.29836	1.1227	0.274689	0.664363	-6.31061
Mov10	0.144709	-2.88749	1.14191	0.266803	0.657461	-6.28936
Dpysl2	0.14468	2.84187	1.02634	0.316825	0.700571	-6.41241
Mrpl18	0.144461	-2.48107	1.23211	0.23201	0.629762	-6.18533
Cltc	0.144026	6.2352	1.24225	0.228327	0.624895	-6.17322
Slc12a9	0.143956	0.407038	1.20076	0.243687	0.638629	-6.22226
Dirc2	0.143867	-2.93472	1.16562	0.257303	0.650185	-6.26268
Wls	0.143834	-2.81158	1.22167	0.23585	0.632373	-6.19772
Gstm2	0.143717	1.81584	1.18688	0.249	0.645278	-6.23835
Gmip	0.14339	-1.45017	1.1132	0.278651	0.669441	-6.32101
Bzw1	0.143124	2.6433	1.19672	0.245225	0.640567	-6.22696
Pltp	0.143021	-0.0761461	1.17829	0.252331	0.648439	-6.24823
Swap70	0.143017	0.853064	0.947214	0.354686	0.734566	-6.48984
Map2k4	0.142967	-1.50066	1.08127	0.292276	0.681343	-6.35538
Flnb	0.142749	5.03057	1.11835	0.276497	0.666696	-6.31538
Jpt2	0.142714	0.0889228	1.19499	0.245886	0.640567	-6.22897
Apaf1	0.142523	-0.0573465	1.15657	0.260896	0.652352	-6.27291
Man2a1	0.142417	2.2798	1.04485	0.308392	0.692479	-6.39348
Wdr48	0.14223	-2.50299	1.15867	0.260061	0.651642	-6.27055
Rab11b	0.142165	4.24469	1.21434	0.238578	0.635779	-6.20637
Apip	0.142098	0.0312062	1.17662	0.25298	0.649147	-6.25014
Ddost	0.141831	3.53086	1.21757	0.237374	0.634711	-6.20257
Cstf3	0.141829	-1.87865	0.944395	0.35609	0.734566	-6.49249
Aldh7a1	0.141776	-0.031962	1.01923	0.320104	0.703197	-6.41959
Pdhx	0.141567	0.0779357	0.877413	0.390544	0.762132	-6.55341
Atg7	0.141482	2.55811	1.17609	0.253188	0.649147	-6.25075
Scamp4	0.141482	0.707541	1.09822	0.284984	0.674165	-6.33724
Tbc1d5	0.141382	-1.25367	1.19759	0.244893	0.640515	-6.22595
Mtco1	0.141081	-0.17475	1.16216	0.258671	0.651034	-6.2666
Rab13	0.1409	-1.69857	1.15959	0.259692	0.651353	-6.2695
Man2b1	0.140831	4.28806	1.12708	0.272873	0.663219	-6.30579
Ehbp1l1	0.140748	-0.402775	1.19327	0.246542	0.64101	-6.23096
Phlda3	0.140548	0.414599	1.16364	0.258086	0.651034	-6.26493
Lrrfip1	0.140376	2.75337	1.20542	0.241925	0.637574	-6.21682
Coro7	0.140289	2.98346	1.16123	0.25904	0.651225	-6.26765
Xdh	0.140212	4.01094	1.15252	0.262521	0.653009	-6.27748
Gm45785	0.140145	-1.70508	1.04758	0.307162	0.691814	-6.39067
Washc5	0.139739	1.9898	0.962617	0.347084	0.727294	-6.47521
Dad1	0.139728	0.0899645	1.15833	0.260195	0.651642	-6.27093
Ndufaf2	0.139503	-1.10634	1.15945	0.25975	0.651353	-6.26967
Eps15	0.139315	2.83124	1.04786	0.307036	0.691814	-6.39038
Aco2	0.138189	4.33451	1.06231	0.300586	0.684456	-6.37536
Antxr2	0.137878	-1.80734	1.10746	0.281066	0.671568	-6.32726
Fcer1g	0.137853	-0.870949	1.11157	0.279334	0.669859	-6.32278
Ppig	0.137826	-1.09207	0.874575	0.39205	0.762132	-6.5559
Tns3	0.137635	0.216629	1.0709	0.296802	0.681896	-6.36635
Ugt1a6b	0.137567	-1.47462	1.07684	0.294201	0.681896	-6.36007
Ndufs4	0.137562	1.15385	1.14198	0.266775	0.657461	-6.28928
Ehd2	0.13741	2.2535	1.15067	0.263264	0.653255	-6.27956
Bloc1s3	0.137339	-2.50602	1.0683	0.297941	0.682193	-6.36908
Rab5a	0.137107	1.08446	1.03028	0.315018	0.699523	-6.40841
Fabp4	0.137068	4.04868	1.17659	0.252993	0.649147	-6.25017
Rpl7a	0.136652	3.86875	1.17994	0.251687	0.648439	-6.24633
Gatd1	0.136467	0.534917	0.971616	0.342694	0.723335	-6.46656
Mrpl17	0.136446	-3.54212	0.941586	0.357492	0.734566	-6.49513
Bud31	0.136428	-0.769625	1.08807	0.289331	0.678195	-6.34813
Reps1	0.136424	-2.8723	1.04128	0.310007	0.694529	-6.39716
Igfbp6	0.136316	-0.779159	1.07792	0.293731	0.681896	-6.35893
Prkcd	0.136225	1.41834	1.16302	0.258332	0.651034	-6.26563
Tpp1	0.136192	3.43381	1.07023	0.297094	0.681896	-6.36705
Ndufb3	0.136089	-0.308687	1.15638	0.260974	0.652352	-6.27313
Anp32a	0.136007	0.94335	1.04135	0.309973	0.694529	-6.39708
Nampt	0.135897	3.94738	1.08304	0.291506	0.680869	-6.35349
Timm50	0.135764	-0.581079	1.10127	0.283687	0.673221	-6.33396
Abhd16a	0.135749	-1.06278	1.13765	0.268537	0.658348	-6.2941
Rab32	0.135578	2.69535	1.16223	0.258646	0.651034	-6.26652
Gclc	0.135553	0.498991	1.04629	0.307745	0.691814	-6.39201
Pla2g15	0.135164	2.47352	1.16804	0.256344	0.65009	-6.25992
Reep5	0.134737	1.56288	1.10922	0.280324	0.671166	-6.32534
Ggh	0.134734	0.694433	1.07928	0.293141	0.681896	-6.35749
Usp7	0.134731	-1.05342	1.05673	0.303066	0.686765	-6.38118
Ccdc91	0.134582	-1.45046	1.10602	0.281673	0.6718	-6.32882
Msn	0.134459	5.31585	0.937826	0.359375	0.734566	-6.49865
Slc25a3	0.134388	0.757881	1.03444	0.313114	0.698321	-6.40416
Rexo2	0.133806	1.29852	0.957601	0.349547	0.729329	-6.48
Cpq	0.133719	1.8177	1.09558	0.286108	0.67464	-6.34008
Rap1a	0.13367	0.578002	1.06214	0.300662	0.684456	-6.37554
Eif5a	0.133645	3.37025	1.11202	0.279147	0.669837	-6.3223
Ehd4	0.133302	2.99695	1.13961	0.267739	0.657621	-6.29192
Thumpd3	0.133293	-1.07293	1.05583	0.30347	0.687285	-6.38212
Nek7	0.133286	-1.3702	1.14306	0.266335	0.657461	-6.28807
H1f0	0.133017	-0.515416	1.12425	0.274044	0.66388	-6.3089
Lasp1	0.132912	4.60712	1.1177	0.276768	0.666943	-6.31609
Canx	0.132899	4.68193	1.06973	0.297313	0.681896	-6.36758
Lztfl1	0.132611	-0.714005	1.09427	0.286671	0.675489	-6.34149
Dbn1	0.132471	-0.664364	1.02605	0.316959	0.700571	-6.41271
Nt5c2	0.132388	0.604471	1.10896	0.280431	0.671166	-6.32562
Mdh1	0.132367	3.79317	1.05782	0.302583	0.686448	-6.38005
Adh1	0.13215	-1.67635	1.00371	0.327353	0.708876	-6.43513
Hook3	0.132138	1.45815	0.953849	0.351398	0.731292	-6.48356
Acin1	0.132029	0.467531	1.0182	0.320581	0.703853	-6.42063
Rad21	0.132026	-1.05484	1.02272	0.318492	0.701791	-6.41608
Rps10	0.131838	3.29903	0.970849	0.343067	0.723479	-6.4673
Rbx1	0.131677	-1.09029	1.14612	0.265096	0.65684	-6.28465
Evi2b	0.131667	-2.20176	1.10673	0.281371	0.6718	-6.32804
Fryl	0.131532	-2.06971	1.08574	0.290338	0.679055	-6.35062
Ttyh2	0.131039	-0.796567	0.923767	0.366474	0.741201	-6.51169
Dpp8	0.130935	0.564785	1.14076	0.26727	0.657621	-6.29064
Ciao2a	0.130772	0.235188	1.09568	0.286066	0.67464	-6.33997
Atox1	0.130618	0.963123	0.92178	0.367485	0.741464	-6.51352
Senp3	0.130274	-4.3296	1.06931	0.297499	0.681896	-6.36802
Il18	0.130197	-3.53701	0.914216	0.371351	0.746859	-6.52045
Safb2	0.130056	-1.72639	1.01628	0.321475	0.704641	-6.42257
Mtrex	0.130025	-0.536886	1.11944	0.276043	0.666008	-6.31419
Dock8	0.129865	-0.222136	1.02799	0.316065	0.699523	-6.41073
Pgghg	0.129695	-0.890521	1.01192	0.323504	0.705956	-6.42694
Pdcl	0.129664	-5.38391	0.989946	0.333871	0.715293	-6.44872
Vipas39	0.129261	-1.3571	1.12147	0.2752	0.664785	-6.31197
Atp5mg	0.129079	0.917751	1.07063	0.296918	0.681896	-6.36663
Atp5f1b	0.129068	3.87823	1.01073	0.324061	0.706075	-6.42813
Ewsr1	0.129055	2.56516	0.935225	0.360681	0.734735	-6.50108
Pgm2	0.12904	2.10152	1.10606	0.281654	0.6718	-6.32877
Camk2d	0.129029	0.370448	1.07029	0.297068	0.681896	-6.36699
Stam2	0.128772	-2.32065	1.09797	0.285088	0.674165	-6.33751
Atp2b1	0.128727	2.13642	1.10137	0.283644	0.673221	-6.33385
Cybc1	0.128515	-0.677043	1.07095	0.296778	0.681896	-6.36629
Cd151	0.128397	-0.943671	0.99466	0.331628	0.713844	-6.44409
Naa10	0.127728	-2.13526	0.912491	0.372236	0.747119	-6.52202
Pura	0.127564	1.34295	1.07323	0.295778	0.681896	-6.36389
Dhx29	0.127346	-4.1074	1.01972	0.319877	0.703089	-6.4191
Atp6v0d1	0.127192	3.12399	0.979317	0.338968	0.720603	-6.4591
Hacd3	0.127177	-1.47408	1.04742	0.307235	0.691814	-6.39084
Anxa3	0.127002	4.52021	1.08988	0.288554	0.677176	-6.3462
Hp1bp3	0.126958	1.77684	0.950078	0.353264	0.733631	-6.48713
2020-09-07	0.126843	3.7918	0.939846	0.358362	0.734566	-6.49676
Inppl1	0.126782	-0.425352	1.03882	0.311123	0.695536	-6.39969
Ipo11	0.126628	-1.81709	1.10827	0.280722	0.671166	-6.32637
Prps2	0.126469	1.33897	1.09073	0.288189	0.677125	-6.34529
Glmn	0.126296	-2.81947	1.00848	0.325113	0.706736	-6.43038
Dock2	0.126139	1.55015	0.91016	0.373435	0.747173	-6.52415
Anxa5	0.125813	5.43484	0.974329	0.341378	0.72209	-6.46394
Itpa	0.125749	0.493348	1.03254	0.313983	0.699246	-6.40611
D6Wsu163e	0.125552	-3.11086	1.04667	0.307574	0.691814	-6.39161
Acap2	0.125387	2.10088	0.931948	0.362332	0.736213	-6.50412
Sqor	0.125378	2.06323	1.05398	0.304293	0.688361	-6.38404
Mia3	0.125365	-2.03985	1.02785	0.316131	0.699523	-6.41088
Sorbs3	0.125342	0.13776	0.995868	0.331055	0.713844	-6.44289
Pym1	0.125338	-0.241178	1.07321	0.295789	0.681896	-6.36391
Smpd2	0.125236	-0.441528	0.90681	0.375161	0.748635	-6.52718
Pam	0.125046	-2.50901	1.05744	0.302753	0.686448	-6.38045
Mtmr2	0.124789	-1.46369	1.00107	0.328595	0.710009	-6.43775
Atp5f1a	0.124614	5.15906	0.967042	0.344921	0.725759	-6.47097
Fam45a	0.124564	0.43496	1.01025	0.324283	0.706075	-6.42861
Glb1	0.124421	3.15269	0.939129	0.358722	0.734566	-6.49743
Mccc1	0.124114	-0.0847371	0.994612	0.331651	0.713844	-6.44413
Coro1b	0.123644	2.9944	0.927506	0.364577	0.738876	-6.50824
Clic4	0.123557	1.88633	1.0024	0.327967	0.709366	-6.43643
Tab1	0.123182	-0.112499	0.873235	0.392763	0.762132	-6.55708
Aaas	0.122779	-1.70643	0.950639	0.352986	0.733439	-6.4866
Clint1	0.12243	1.80579	1.01258	0.323197	0.705681	-6.42628
Sar1b	0.122331	-1.54727	1.0691	0.29759	0.681896	-6.36824
Pepd	0.122182	2.64654	0.919854	0.368467	0.742571	-6.51529
Rela	0.122165	0.513383	1.05902	0.302048	0.685769	-6.3788
Rps3a	0.122149	3.89276	0.882892	0.387646	0.760286	-6.54859
Tpp2	0.12213	2.69104	0.929906	0.363363	0.737929	-6.50602
Idh3a	0.122064	3.29972	1.0312	0.314593	0.699523	-6.40747
Fndc3a	0.122057	0.216704	0.986722	0.335412	0.716957	-6.45188
Psmd10	0.121892	-0.655249	0.859227	0.400263	0.76435	-6.56924
Skap2	0.121692	0.3473	0.994486	0.331711	0.713844	-6.44426
Clptm1	0.121521	0.798418	1.0466	0.307605	0.691814	-6.39168
Cox6b1	0.121383	2.82053	1.00008	0.329063	0.710633	-6.43873
Sri	0.120897	3.00892	0.879591	0.38939	0.762132	-6.5515
Npl	0.120721	3.13566	1.03237	0.314059	0.699246	-6.40628
Fnbp1	0.120538	0.950339	0.957258	0.349716	0.729329	-6.48032
Plcd1	0.120238	1.32023	0.948308	0.354143	0.733913	-6.48881
Hspe1	0.12021	4.2907	0.833013	0.414545	0.773938	-6.59151
Pcolce	0.120081	0.998114	1.00208	0.328118	0.709366	-6.43675
Nop56	0.119684	0.725997	1.01151	0.323697	0.705987	-6.42735
Glb1l	0.119556	-1.27468	0.965245	0.345798	0.726305	-6.47269
Bcat2	0.119555	2.0303	1.02559	0.317167	0.70064	-6.41317
Cyc1	0.119372	0.978672	0.9106	0.373208	0.747173	-6.52375
Mindy1	0.119272	-1.14109	0.973712	0.341677	0.72209	-6.46454
Ndufs1	0.119231	2.47891	0.960017	0.348359	0.728509	-6.47769
Fip1l1	0.118956	-4.76661	1.01018	0.324319	0.706075	-6.42868
Mob1b	0.11894	0.784325	0.993109	0.332365	0.714079	-6.44561
Htra2	0.11834	-1.34279	0.967371	0.34476	0.725759	-6.47065
Rab18	0.118294	1.92094	0.950996	0.352809	0.733439	-6.48627
Ggcx	0.118214	-2.01944	0.864586	0.397383	0.762358	-6.56461
Sptbn1	0.118141	4.31001	0.88714	0.385409	0.757779	-6.54482
Oga	0.117798	0.571663	0.897121	0.380186	0.752377	-6.53592
Golga2	0.117772	-2.1727	1.00577	0.326382	0.707549	-6.43308
Hba	0.117692	3.04073	0.99714	0.330452	0.713242	-6.44164
Ptgr2	0.11762	0.297549	0.957275	0.349708	0.729329	-6.48031
Fkbp7	0.117549	-0.694546	0.94069	0.35794	0.734566	-6.49597
Siglec1	0.116649	3.86958	0.991389	0.333183	0.714767	-6.4473
Lpcat3	0.11639	-3.53668	0.921299	0.36773	0.741464	-6.51396
Otub1	0.116382	0.848686	0.991084	0.333329	0.714767	-6.44761
Pgrmc2	0.116342	0.725414	0.940291	0.35814	0.734566	-6.49634
Gda	0.116303	4.23793	0.808292	0.428308	0.779911	-6.61192
Adrm1	0.116302	1.30608	0.928635	0.364006	0.738334	-6.5072
Nudt3	0.116167	-0.59109	0.959932	0.348401	0.728509	-6.47777
Endog	0.116051	-1.60618	0.95364	0.351501	0.731292	-6.48376
Ppid	0.115492	1.72579	0.956148	0.350263	0.730084	-6.48138
Atp5pb	0.115284	2.74976	0.986484	0.335526	0.716957	-6.45212
Ythdf3	0.114982	-3.27707	0.838262	0.41166	0.771996	-6.5871
Prdx4	0.114907	1.85399	0.936927	0.359826	0.734735	-6.49949
Lcp1	0.114882	5.48107	0.964708	0.346061	0.726305	-6.47321
Actr1b	0.114633	-0.981822	0.994678	0.331619	0.713844	-6.44407
Gdi1	0.114487	0.0206695	0.945162	0.355708	0.734566	-6.49177
Efnb1	0.114377	-1.82749	0.940009	0.358281	0.734566	-6.49661
Rap1gds1	0.114347	-0.590199	0.853987	0.403092	0.765876	-6.57374
Luzp1	0.114138	-3.74885	0.826233	0.418292	0.776524	-6.59716
Kirrel1	0.113919	-1.65528	0.871154	0.393871	0.762132	-6.5589
Gale	0.113646	-1.27992	0.810331	0.427162	0.779911	-6.61026
Kif5b	0.113554	2.82426	0.902556	0.377362	0.750169	-6.53103
Arpc4	0.113535	3.95699	0.856887	0.401525	0.764514	-6.57125
Sec23ip	0.113053	0.899922	0.874915	0.39187	0.762132	-6.55561
Stx8	0.112901	0.663593	0.907215	0.374952	0.748635	-6.52682
Pdlim5	0.112821	-0.865774	0.937945	0.359315	0.734566	-6.49854
Mtch1	0.112651	-0.133441	0.948901	0.353848	0.733687	-6.48825
Vps26b	0.112601	0.397688	0.884978	0.386546	0.75926	-6.54674
Usp16	0.112398	-3.45215	0.938733	0.35892	0.734566	-6.4978
Rbm25	0.112186	-1.3248	0.909865	0.373587	0.747173	-6.52441
Dnpep	0.11167	1.84499	0.717001	0.481555	0.815803	-6.68227
Rbm26	0.11166	-1.92197	0.824739	0.41912	0.776541	-6.5984
Cpd	0.111635	-1.64967	0.813653	0.425299	0.779911	-6.60754
Bcl10	0.111465	-1.36289	0.874528	0.392075	0.762132	-6.55595
Cyth4	0.110977	-2.2975	0.943022	0.356775	0.734566	-6.49378
Csrp2	0.11094	0.304793	0.937624	0.359476	0.734566	-6.49884
Cops2	0.110931	1.45296	0.81627	0.423835	0.779431	-6.6054
Atp5pf	0.110766	1.2504	0.882982	0.387599	0.760286	-6.54851
Ttr	0.110743	-1.11256	0.881912	0.388163	0.760546	-6.54945
Gm11273	0.11057	1.91733	0.921496	0.36763	0.741464	-6.51378
Pmpca	0.110551	-0.406259	0.818697	0.422481	0.778389	-6.6034
Ctsz	0.11043	4.29318	0.858337	0.400742	0.76435	-6.57001
Clasp1	0.110408	-1.14501	0.809214	0.427789	0.779911	-6.61117
Psip1	0.11036	-1.34669	0.792791	0.437081	0.785157	-6.62442
Armt1	0.110335	-1.28269	0.891671	0.383032	0.754984	-6.54079
Keap1	0.110319	-4.68984	0.84934	0.405612	0.768446	-6.57771
Aifm1	0.110061	2.39446	0.813599	0.425329	0.779911	-6.60759
Emc7	0.11005	-0.322204	0.906338	0.375406	0.748635	-6.52761
Snx6	0.109941	3.58736	0.904027	0.3766	0.749786	-6.5297
Nelfb	0.109799	-3.75956	0.802719	0.431449	0.781026	-6.61644
Eml1	0.109719	-2.34847	0.856744	0.401602	0.764514	-6.57138
Suclg1	0.109579	1.25834	0.868641	0.395213	0.762132	-6.56109
Rhob	0.109484	-1.53141	0.894785	0.381405	0.752902	-6.53801
Sbds	0.109448	-0.483984	0.914762	0.371071	0.746676	-6.51995
Fkbp8	0.109156	1.11251	0.913022	0.371964	0.747067	-6.52154
Tmem109	0.108976	-0.694837	0.850613	0.404921	0.767873	-6.57663
Cr1l	0.108923	-0.250891	0.895206	0.381185	0.752902	-6.53763
Vapa	0.108345	1.95638	0.865571	0.396855	0.762132	-6.56375
Tfrc	0.108205	2.87936	0.936206	0.360188	0.734735	-6.50016
Ptms	0.108092	2.37698	0.810156	0.42726	0.779911	-6.6104
Tns1	0.10809	3.73239	0.7754	0.447056	0.794185	-6.63818
Slc25a20	0.108081	0.719991	0.84949	0.405531	0.768446	-6.57759
Chmp1a	0.107888	0.663239	0.929333	0.363652	0.738138	-6.50655
Arhgap17	0.10765	-3.72065	0.905402	0.375889	0.748747	-6.52846
Ptpa	0.107622	2.1733	0.90895	0.374058	0.747737	-6.52524
Hspa4	0.107477	4.81554	0.836893	0.412411	0.772074	-6.58825
Lamtor3	0.107465	-1.0548	0.935288	0.36065	0.734735	-6.50102
Cdc42bpb	0.107192	0.583001	0.921641	0.367556	0.741464	-6.51365
Dcps	0.106456	-0.019557	0.807747	0.428614	0.779911	-6.61236
Iqgap1	0.106456	4.63437	0.85628	0.401853	0.764623	-6.57178
Ap3m1	0.106438	0.496776	0.894837	0.381377	0.752902	-6.53796
Soat1	0.10641	2.64364	0.870832	0.394043	0.762132	-6.55918
Zc3h15	0.106056	-0.0948079	0.756178	0.458241	0.802483	-6.65305
Spag7	0.106019	-2.52012	0.865525	0.396879	0.762132	-6.56379
Arl2	0.105996	-1.42269	0.822118	0.420576	0.778058	-6.60057
Gnpda1	0.10598	2.13659	0.897689	0.37989	0.75225	-6.53541
Asl	0.105636	2.34123	0.808412	0.42824	0.779911	-6.61182
Ppp3r1	0.105629	0.591646	0.866197	0.396519	0.762132	-6.56321
Erlin2	0.105403	1.1239	0.91291	0.372021	0.747067	-6.52164
Wdr61	0.105269	-0.809828	0.817888	0.422932	0.778494	-6.60406
Nedd4	0.105092	1.79358	0.867087	0.396043	0.762132	-6.56244
Trmt5	0.105053	-2.67958	0.831674	0.415284	0.774151	-6.59263
Pgm3	0.105018	0.146947	0.852523	0.403885	0.766645	-6.575
Colec12	0.105016	1.61349	0.859295	0.400226	0.76435	-6.56918
Plekho2	0.104841	1.49955	0.838111	0.411743	0.771996	-6.58723
Marcks	0.104576	2.1538	0.868738	0.395161	0.762132	-6.561
Sub1	0.104337	1.17408	0.873161	0.392802	0.762132	-6.55714
Tpt1	0.10433	2.336	0.699111	0.492428	0.822315	-6.69512
Pdcd10	0.104225	0.341357	0.868152	0.395474	0.762132	-6.56151
Aldh1l1	0.104125	1.79873	0.772538	0.448711	0.796275	-6.64042
Sec23a	0.104043	2.1558	0.868134	0.395483	0.762132	-6.56153
Uqcrc1	0.10401	2.01116	0.802866	0.431366	0.781026	-6.61632
Tspo	0.103974	-0.225416	0.846029	0.407414	0.76891	-6.58053
Cyba	0.103939	0.579511	0.817374	0.423219	0.778659	-6.60449
Ube2n	0.103888	2.10706	0.814824	0.424644	0.779829	-6.60658
Cox17	0.10349	1.00042	0.846843	0.40697	0.768845	-6.57984
Lsm4	0.10307	0.11407	0.865858	0.396701	0.762132	-6.5635
Tecr	0.102982	3.14531	0.768673	0.450951	0.797998	-6.64343
Dclk1	0.102717	0.599594	0.88229	0.387963	0.760531	-6.54912
Kpna2	0.101971	-1.89699	0.697947	0.49314	0.822315	-6.69594
Mydgf	0.101626	0.892675	0.791648	0.437732	0.785612	-6.62534
Tardbp	0.101567	2.36061	0.741325	0.466999	0.809093	-6.6643
Cox7a2	0.100854	0.519248	0.832079	0.41506	0.774151	-6.59229
Entpd1	0.100797	0.0865028	0.863012	0.398227	0.763607	-6.56597
Ubtf	0.100571	-0.235705	0.837703	0.411967	0.771996	-6.58757
Cwc15	0.100183	-4.39693	0.812335	0.426037	0.779911	-6.60862
Ap2b1	0.100176	2.54064	0.800299	0.432817	0.781048	-6.61839
Tnfaip8	0.0998349	1.00246	0.868838	0.395107	0.762132	-6.56091
Caprin1	0.0997528	2.25798	0.762145	0.454751	0.799455	-6.64847
Dock7	0.09948	-0.790911	0.85507	0.402506	0.765498	-6.57281
Nrbp1	0.099425	-2.04579	0.718302	0.480769	0.815803	-6.68132
Dnajb4	0.0993809	1.00386	0.808434	0.428228	0.779911	-6.6118
Slc38a10	0.0993736	-1.1185	0.777006	0.446129	0.793832	-6.63692
Tmem115	0.0991953	-5.57171	0.660735	0.516222	0.837985	-6.72164
Bckdhb	0.0991437	-0.155448	0.831914	0.415151	0.774151	-6.59243
Ube3c	0.0990749	-2.28122	0.7953	0.435654	0.784826	-6.62241
Gapdh	0.0989978	-0.396791	0.769178	0.450658	0.797998	-6.64303
Hnrnpll	0.0989522	0.505976	0.839187	0.411153	0.771912	-6.58632
Dcxr	0.0988349	2.12095	0.788222	0.439688	0.787692	-6.62807
Dpp3	0.0983749	3.28253	0.829394	0.416543	0.774671	-6.59453
Clcn7	0.0983092	1.07821	0.71607	0.482117	0.815803	-6.68295
Abcb7	0.0982938	-2.80643	0.758141	0.457092	0.801887	-6.65155
Denr	0.0981027	0.65513	0.694166	0.495458	0.82311	-6.69862
Plpp3	0.0980909	0.547697	0.795209	0.435706	0.784826	-6.62249
Wdr37	0.097903	0.117017	0.610976	0.548007	0.855862	-6.75389
Mpi	0.0978979	-0.829951	0.733467	0.471672	0.809752	-6.67017
Srp54	0.0976261	1.57089	0.744449	0.465149	0.80803	-6.66195
Twf1	0.0975183	2.77514	0.806588	0.429267	0.780341	-6.61331
Hnrnpd	0.0975106	2.51438	0.738885	0.468447	0.809093	-6.66613
Ecpas	0.097431	1.12815	0.788339	0.439621	0.787692	-6.62797
Gabpa	0.0972695	-2.12414	0.820275	0.421601	0.778281	-6.6021
Serpinf1	0.0971266	-1.27146	0.710993	0.48519	0.817685	-6.68662
Cox4i1	0.097009	3.03878	0.83325	0.414415	0.773938	-6.59131
Golga5	0.0969761	-0.577484	0.80067	0.432608	0.781026	-6.6181
Snx30	0.0968439	0.152199	0.807941	0.428505	0.779911	-6.6122
Plod2	0.0967896	-3.48924	0.73404	0.471331	0.809752	-6.66974
Emc10	0.0964852	-1.54574	0.748891	0.462525	0.805959	-6.6586
Sar1a	0.0962903	-1.16315	0.815514	0.424258	0.779829	-6.60602
Ppp1r12c	0.0962822	0.225663	0.75654	0.458029	0.802483	-6.65278
Hdac2	0.0960592	0.728412	0.709339	0.486194	0.818678	-6.68781
Arpc1b	0.0960419	3.98576	0.740673	0.467386	0.809093	-6.66479
Pfkl	0.0960125	1.75024	0.757773	0.457307	0.801887	-6.65183
Snrnp200	0.0959917	2.01382	0.82082	0.421298	0.778281	-6.60165
Itch	0.0959736	-2.24609	0.796417	0.435019	0.784304	-6.62152
Pcbd2	0.0959153	-0.651995	0.811098	0.426731	0.779911	-6.60963
Ppp1r2	0.0959041	-2.61186	0.767005	0.45192	0.797998	-6.64472
Slc35b2	0.0957204	-0.584009	0.740928	0.467235	0.809093	-6.6646
Sephs1	0.0956302	-1.09703	0.779476	0.444705	0.793085	-6.63498
Nup85	0.0956091	-2.72616	0.821847	0.420726	0.778058	-6.6008
Epb41	0.0954298	-0.75568	0.748556	0.462723	0.805959	-6.65885
Aldh3a2	0.0953917	1.09966	0.71351	0.483665	0.816508	-6.6848
Etfdh	0.0949254	1.9519	0.790845	0.438191	0.786078	-6.62598
Atp1a3	0.0948542	-1.86216	0.804301	0.430556	0.781026	-6.61516
Sumf1	0.0948009	-1.97154	0.830288	0.416049	0.774353	-6.59379
Atg101	0.0947665	-3.82015	0.815156	0.424458	0.779829	-6.60631
Pank4	0.0946847	-3.47868	0.787122	0.440318	0.788117	-6.62894
Ppia	0.0944809	5.18718	0.807358	0.428833	0.779911	-6.61268
Pex5	0.0944342	-2.10327	0.760945	0.455452	0.799976	-6.6494
Lmod1	0.094316	-1.2873	0.715907	0.482216	0.815803	-6.68306
Echs1	0.0939819	3.00292	0.71732	0.481362	0.815803	-6.68204
Armc8	0.093894	-1.03442	0.734002	0.471353	0.809752	-6.66977
Fkbp3	0.0937262	1.42554	0.694176	0.495452	0.82311	-6.69861
Parva	0.093683	0.235728	0.703676	0.48964	0.82078	-6.69187
Uba1	0.0935881	4.00467	0.766085	0.452455	0.797998	-6.64543
Map2k1	0.0935866	1.35213	0.71436	0.483151	0.81618	-6.68419
Cd38	0.0932258	1.15571	0.648851	0.523719	0.843378	-6.72956
Aldh3b1	0.0927854	1.67881	0.739763	0.467926	0.809093	-6.66547
Smarca5	0.0927201	0.078813	0.777031	0.446115	0.793832	-6.6369
Ywhaz	0.0927186	4.16075	0.73407	0.471313	0.809752	-6.66972
Acyp2	0.0926241	-2.49692	0.778265	0.445403	0.793757	-6.63593
Exosc9	0.0924827	-2.88365	0.67224	0.509022	0.832804	-6.71384
Commd6	0.0924247	-0.976434	0.674153	0.50783	0.832067	-6.71253
Eef1b	0.0922139	2.35617	0.63696	0.53128	0.847303	-6.73735
Cd2bp2	0.0921791	-5.33216	0.716571	0.481815	0.815803	-6.68258
Cetn2	0.0920926	-4.24985	0.751774	0.460828	0.805124	-6.65641
Scp2	0.0916788	2.16841	0.7113	0.485004	0.817685	-6.6864
Erh	0.091671	0.993541	0.707895	0.487071	0.818939	-6.68885
Vcpip1	0.0911642	-1.74599	0.735453	0.470488	0.809752	-6.66869
Nipsnap1	0.0911317	-1.11566	0.715943	0.482194	0.815803	-6.68304
Uqcr11	0.0910795	-0.81972	0.677934	0.505479	0.83028	-6.70993
Seh1l	0.090992	-3.10343	0.609573	0.548918	0.856086	-6.75476
Cd180	0.0908685	1.50426	0.762873	0.454326	0.799064	-6.64791
Ubqln2	0.0908422	-1.77139	0.721859	0.478627	0.815316	-6.67873
Pf4	0.0907621	-0.174409	0.685933	0.500526	0.827303	-6.70439
Hpcal1	0.0906564	1.2028	0.564675	0.578491	0.869031	-6.78171
Capn2	0.0902087	3.64659	0.73524	0.470615	0.809752	-6.66885
Ldah	0.0899	-0.7746	0.764066	0.453631	0.798553	-6.64699
Ufc1	0.0898673	0.692322	0.733503	0.471651	0.809752	-6.67014
Reep3	0.0898314	-2.48893	0.655973	0.519219	0.83837	-6.72483
Tmem192	0.0898312	-2.35189	0.655822	0.519314	0.83837	-6.72493
Nudcd3	0.0898224	-2.42253	0.716428	0.481901	0.815803	-6.68269
Tbxas1	0.089661	1.64928	0.782296	0.443084	0.791264	-6.63276
Gnl3	0.0894908	-2.88763	0.748708	0.462633	0.805959	-6.65874
Agpat4	0.0894693	-2.70629	0.750419	0.461625	0.805959	-6.65744
Slc38a9	0.0893468	-1.46356	0.72425	0.477189	0.81412	-6.67697
Spryd4	0.0890018	-0.331808	0.707998	0.487009	0.818939	-6.68877
Papss2	0.0885738	-0.25398	0.712893	0.484039	0.81679	-6.68525
Ik	0.0884824	-1.60906	0.72608	0.476091	0.813099	-6.67563
Hspd1	0.0884555	4.62258	0.728035	0.474919	0.811901	-6.67419
Eif2s2	0.0882248	2.20552	0.752453	0.460428	0.804783	-6.65589
Ywhae	0.0878393	3.61862	0.593964	0.559108	0.857569	-6.76436
Plcg2	0.0878301	1.1592	0.675982	0.506692	0.830891	-6.71127
Slc25a12	0.0877962	1.05683	0.636177	0.531779	0.847416	-6.73786
Tmx1	0.0877679	0.250981	0.693609	0.4958	0.82311	-6.69901
Idh2	0.0877398	3.57837	0.765251	0.452941	0.797998	-6.64608
Tmem205	0.0871708	-1.10439	0.729077	0.474295	0.811835	-6.67342
Mpst	0.086993	0.935047	0.711612	0.484815	0.817685	-6.68617
Gsdmdc1	0.0869396	0.62162	0.706187	0.48811	0.820158	-6.69007
Rpl37a	0.0866918	0.436088	0.72903	0.474324	0.811835	-6.67346
Yars	0.0866051	2.07355	0.614332	0.54583	0.855031	-6.75179
Myo5a	0.0861882	2.80607	0.693434	0.495907	0.82311	-6.69913
Npepps	0.0861628	2.7212	0.725644	0.476352	0.813194	-6.67595
Hsdl2	0.0861441	-0.680262	0.738936	0.468417	0.809093	-6.66609
Ppp1cc	0.0861369	-0.470218	0.653111	0.521025	0.840445	-6.72674
2210016F16Rik	0.0860911	0.614223	0.693898	0.495622	0.82311	-6.69881
Trem2	0.0860565	-0.244256	0.69251	0.496475	0.823313	-6.69978
Akap12	0.0859525	2.16741	0.628332	0.536803	0.849258	-6.74292
Pex14	0.0858752	-0.883756	0.736637	0.469784	0.809752	-6.66781
Arfgef2	0.0853975	-0.58703	0.619193	0.542687	0.85364	-6.74873
Farp1	0.0846322	-0.802891	0.687069	0.499825	0.826798	-6.7036
Nt5c3a	0.0844067	1.33264	0.574799	0.571752	0.865446	-6.77581
Emilin1	0.0842345	-1.57673	0.681122	0.503502	0.829444	-6.70773
Atp5c1	0.0841928	2.65783	0.689272	0.498467	0.824934	-6.70206
Eif3i	0.0838496	1.50972	0.619779	0.542308	0.85364	-6.74836
Napg	0.0836683	1.43242	0.722783	0.478071	0.81472	-6.67805
Hsd17b12	0.0831804	2.47068	0.720096	0.479688	0.815803	-6.68001
Lars	0.0826634	2.41272	0.664494	0.513863	0.837985	-6.71911
Timm23	0.0825965	-2.35907	0.701441	0.491003	0.821902	-6.69346
D2hgdh	0.0824664	-4.93566	0.684342	0.501509	0.828152	-6.70549
Gdi2	0.0824259	4.69518	0.599772	0.555305	0.857539	-6.76082
Ndufa12	0.0824169	0.139172	0.638534	0.530276	0.846727	-6.73633
Atg3	0.0822287	2.44483	0.668051	0.511637	0.835188	-6.71669
Ogdh	0.0821718	2.92357	0.668664	0.511254	0.834907	-6.71628
Psmc5	0.0820239	2.39941	0.661082	0.516004	0.837985	-6.72141
Prkaca	0.0817194	0.599684	0.663245	0.514646	0.837985	-6.71995
Taldo1	0.081424	2.75137	0.683273	0.50217	0.828287	-6.70624
Bcap31	0.0813165	1.87045	0.644096	0.526735	0.844447	-6.73269
Smc3	0.0811844	1.39437	0.61811	0.543386	0.853656	-6.74941
Trim14	0.0811707	-0.509101	0.605796	0.551374	0.857211	-6.75711
Mtdh	0.0809774	2.03164	0.631464	0.534794	0.848457	-6.7409
Nipsnap2	0.0808655	1.20124	0.64282	0.527546	0.844447	-6.73353
Idh3g	0.0807508	-0.125376	0.600645	0.554734	0.857539	-6.76028
Stk4	0.0802684	-0.399664	0.659134	0.517229	0.837985	-6.72272
Mat2a	0.0801852	1.53673	0.680785	0.503711	0.829444	-6.70796
Atic	0.0801809	3.16158	0.551531	0.587299	0.870886	-6.78922
Map1s	0.0801594	2.46206	0.632618	0.534055	0.848066	-6.74016
Atp5po	0.0799074	1.40365	0.614356	0.545815	0.855031	-6.75178
Cct8	0.079867	2.84613	0.663586	0.514432	0.837985	-6.71972
Tcerg1	0.0798506	0.104205	0.643917	0.526849	0.844447	-6.73281
Hmgb2	0.0798372	1.7296	0.643427	0.52716	0.844447	-6.73313
Mink1	0.0797696	-1.9153	0.570718	0.574464	0.866851	-6.7782
Acsl1	0.0796893	0.482101	0.671739	0.509334	0.832804	-6.71418
Atp6v1f	0.0796257	1.19399	0.642941	0.527469	0.844447	-6.73345
Vsig4	0.0796117	-0.335544	0.683745	0.501879	0.828152	-6.70591
Emb	0.0795806	0.477807	0.684964	0.501125	0.827945	-6.70506
Tars2	0.0795589	-1.79667	0.581298	0.567448	0.863035	-6.77197
Acp1	0.0795011	0.845368	0.64825	0.5241	0.843378	-6.72996
Ociad1	0.0794778	0.356077	0.62917	0.536265	0.849086	-6.74238
Csnk2a1	0.0794224	0.202948	0.65626	0.519038	0.83837	-6.72464
Ndufs6	0.0794172	1.06201	0.636337	0.531677	0.847416	-6.73776
Sgsh	0.0791616	0.806665	0.601998	0.55385	0.857539	-6.75945
Psmb8	0.0789345	2.64981	0.609716	0.548824	0.856086	-6.75467
Tmx2	0.0786663	-2.54745	0.612795	0.546826	0.855526	-6.75275
Usp12	0.0780547	-1.84832	0.629369	0.536137	0.849086	-6.74225
Map2k2	0.0780497	-0.857296	0.641727	0.528242	0.845064	-6.73425
Tufm	0.0778321	2.62855	0.597543	0.556762	0.857539	-6.76218
Vps11	0.0776529	1.93694	0.658359	0.517716	0.837985	-6.72323
Pfn1	0.0774236	2.98269	0.664643	0.51377	0.837985	-6.719
Ugt1a7c	0.0772827	2.65155	0.644509	0.526473	0.844447	-6.73242
Tbc1d10a	0.0771966	-3.09476	0.597404	0.556853	0.857539	-6.76226
Cbr4	0.0768766	-0.773557	0.661732	0.515596	0.837985	-6.72097
Lrpap1	0.0766129	2.29543	0.644845	0.526259	0.844447	-6.7322
Gba	0.0765629	2.85881	0.622681	0.540437	0.852815	-6.74652
Prkaa1	0.0764852	1.28176	0.648211	0.524124	0.843378	-6.72998
Uba7	0.0764754	-1.55964	0.626361	0.538069	0.8505	-6.74418
Cryl1	0.0761534	1.36152	0.598981	0.555821	0.857539	-6.7613
Arfgap1	0.0760012	-1.50316	0.642789	0.527566	0.844447	-6.73355
Osbp	0.0755483	0.330407	0.605842	0.551344	0.857211	-6.75708
Erlec1	0.0754213	-1.61522	0.637747	0.530777	0.847186	-6.73684
Tpd52l2	0.0754009	1.58802	0.581826	0.567099	0.863035	-6.77165
Arsa	0.0753741	1.83444	0.598358	0.556229	0.857539	-6.76168
Chil3	0.0751857	-0.950895	0.610795	0.548124	0.855862	-6.754
Piezo1	0.0751207	-2.67462	0.601256	0.554335	0.857539	-6.75991
Alox5	0.074998	-0.268729	0.626104	0.538234	0.8505	-6.74434
F8a	0.0748727	-0.0702071	0.564758	0.578435	0.869031	-6.78166
Anxa8	0.0748712	2.69877	0.611868	0.547427	0.855862	-6.75333
Ppa2	0.0747649	0.678849	0.621689	0.541076	0.852847	-6.74715
Dscr3	0.0747412	-0.369684	0.613951	0.546077	0.855031	-6.75203
Ube2r2	0.0746712	-0.267842	0.61928	0.54263	0.85364	-6.74868
Anxa4	0.0746296	4.35322	0.597497	0.556793	0.857539	-6.76221
Kpna1	0.0745714	-0.0605685	0.610901	0.548055	0.855862	-6.75394
Anp32b	0.0744599	1.39925	0.552513	0.586639	0.870886	-6.78867
Brcc3	0.0743771	-0.662531	0.585389	0.564747	0.861397	-6.76953
Prdx1	0.0743192	4.27081	0.574696	0.571821	0.865446	-6.77587
Pnp	0.074131	2.6415	0.574725	0.571802	0.865446	-6.77585
Actr1a	0.0738803	-0.122473	0.580903	0.567709	0.863035	-6.7722
Ephx1	0.0737461	4.33764	0.562503	0.579942	0.869818	-6.78296
Spon1	0.0735951	-4.30618	0.507337	0.617394	0.886706	-6.81322
Ampd2	0.0733729	0.442103	0.560797	0.581083	0.870523	-6.78394
Mndal	0.0731633	-0.492827	0.572777	0.573095	0.865446	-6.77699
Bckdha	0.073102	0.814231	0.519975	0.608713	0.882802	-6.80655
Phb2	0.0730835	2.01845	0.630268	0.535561	0.848719	-6.74167
Prpf8	0.0727575	2.03747	0.606965	0.550613	0.857211	-6.75638
Stxbp2	0.0726761	1.79047	0.569543	0.575246	0.867221	-6.77888
Fscn1	0.0724578	2.86097	0.581664	0.567206	0.863035	-6.77175
Cog7	0.0723241	-2.64047	0.592844	0.559843	0.857569	-6.76504
Arpc5	0.0720138	2.58409	0.607973	0.549957	0.857005	-6.75576
Vcp	0.0716862	4.97878	0.595408	0.55816	0.857539	-6.76348
Acot9	0.071639	1.8625	0.518109	0.609991	0.883035	-6.80755
Ephx2	0.0711378	-0.238607	0.495863	0.625324	0.890552	-6.81913
Mboat7	0.0711219	-1.22355	0.505603	0.618589	0.886712	-6.81412
Ube2g2	0.0710653	-1.44492	0.571396	0.574013	0.866501	-6.7778
Rras2	0.071062	0.600578	0.550057	0.588291	0.870886	-6.79005
Dnajc13	0.0710429	3.50817	0.59568	0.557982	0.857539	-6.76331
Ddx5	0.0707959	2.45008	0.574664	0.571842	0.865446	-6.77589
Notch2	0.0707846	-2.21342	0.583124	0.566242	0.86249	-6.77088
Sf3a1	0.0707515	1.89136	0.56459	0.578548	0.869031	-6.78176
Glrx3	0.0707496	2.04459	0.597104	0.55705	0.857539	-6.76245
Snrpd3	0.0707464	0.064981	0.608654	0.549514	0.856679	-6.75533
Slc2a8	0.07062	-1.10668	0.530701	0.601393	0.879433	-6.80077
2020-03-02	0.0706032	2.48875	0.570146	0.574845	0.867094	-6.77853
Gna13	0.0705094	1.90993	0.607665	0.550157	0.857005	-6.75595
Sidt2	0.0704421	-0.116465	0.55095	0.58769	0.870886	-6.78955
Pip4k2a	0.0702991	0.38742	0.580185	0.568184	0.863035	-6.77263
Khdrbs1	0.0697364	-0.148255	0.55767	0.583177	0.870886	-6.78573
Exoc2	0.0697172	0.34264	0.526491	0.604261	0.880537	-6.80306
Gcat	0.0696997	-2.51161	0.595349	0.558199	0.857539	-6.76352
Ppfibp1	0.0695935	0.249335	0.582981	0.566336	0.86249	-6.77096
Nsdhl	0.06952	0.742235	0.572908	0.573008	0.865446	-6.77692
Rpl23	0.0694911	2.11948	0.527189	0.603785	0.880537	-6.80268
Ube2b	0.0694754	-2.24563	0.599783	0.555297	0.857539	-6.76081
Prss23	0.0694611	0.744389	0.580384	0.568053	0.863035	-6.77251
Col2a1	0.0693471	-1.0189	0.588139	0.562935	0.859962	-6.76788
Nop9	0.0693244	-3.22087	0.51592	0.611492	0.884344	-6.80871
Smarcd2	0.0691638	-1.39352	0.599131	0.555723	0.857539	-6.76121
Ap2m1	0.0686851	3.50529	0.548465	0.589363	0.871697	-6.79095
Rps2	0.0685621	4.46526	0.556734	0.583804	0.870886	-6.78627
Cc2d1a	0.0684955	-0.809771	0.555309	0.584761	0.870886	-6.78708
Stard3nl	0.0683208	-1.04402	0.556678	0.583842	0.870886	-6.7863
Ppp1r21	0.068076	0.484216	0.535789	0.597935	0.877621	-6.79799
Arl3	0.0674539	-1.85543	0.555526	0.584615	0.870886	-6.78696
Snx27	0.0672432	2.27678	0.562488	0.579952	0.869818	-6.78297
Hnrnpa1	0.066546	2.85076	0.530224	0.601717	0.879433	-6.80103
Pycr2	0.0661916	-0.617021	0.547428	0.590062	0.871697	-6.79153
Pdpr	0.0661039	-0.88079	0.56757	0.57656	0.868025	-6.78003
Smap	0.0659904	-1.53064	0.536915	0.597171	0.877621	-6.79737
Igbp1	0.0659666	1.8786	0.520647	0.608254	0.882459	-6.80619
Lamtor2	0.0658572	0.996355	0.463145	0.648195	0.901359	-6.83525
Gorasp1	0.0654633	-1.68499	0.535161	0.598361	0.877621	-6.79834
Slc25a4	0.0654115	2.17666	0.534333	0.598923	0.877621	-6.79879
Psma3	0.0653182	3.60205	0.485743	0.632359	0.895087	-6.82423
Top2b	0.0651498	-0.427558	0.559507	0.581946	0.870886	-6.78468
Atp1a1	0.0647188	3.36936	0.524832	0.605393	0.880896	-6.80395
Map4	0.0645166	2.31138	0.487607	0.631061	0.894354	-6.8233
Lipa	0.0644723	1.29355	0.536301	0.597587	0.877621	-6.79771
Plin3	0.0644416	2.7801	0.470086	0.643312	0.90038	-6.83192
Sars	0.0643273	3.212	0.474035	0.640541	0.899744	-6.83
Capn1	0.064321	2.28485	0.473043	0.641237	0.900237	-6.83049
Glipr2	0.0642822	-1.31364	0.528535	0.602868	0.880301	-6.80195
Trappc8	0.0642556	-0.538874	0.506585	0.617912	0.886706	-6.81361
Akr1b10	0.0641106	-0.934954	0.535675	0.598012	0.877621	-6.79805
Nono	0.063993	2.94908	0.528065	0.603188	0.880301	-6.8022
Dock11	0.0638886	-0.512853	0.470377	0.643108	0.90038	-6.83178
Cyb5r1	0.0638494	1.69363	0.510357	0.615315	0.885713	-6.81164
Tubb6	0.0637636	2.13425	0.530351	0.601631	0.879433	-6.80096
Rhoa	0.063694	2.34158	0.497879	0.623928	0.890098	-6.8181
Mgp	0.0636017	1.86374	0.550098	0.588263	0.870886	-6.79003
Trappc6b	0.0635975	0.376726	0.466783	0.645633	0.900969	-6.83351
Stambp	0.0631071	-2.88409	0.408684	0.687057	0.910032	-6.85971
Sash3	0.0629836	-1.55963	0.506645	0.617871	0.886706	-6.81358
Capzb	0.0628468	3.4873	0.524411	0.605681	0.88099	-6.80418
Pfkm	0.0628354	-0.809407	0.517382	0.61049	0.883433	-6.80793
Gnai3	0.0628296	-0.274129	0.465641	0.646437	0.901135	-6.83406
Pdcl3	0.0624294	1.20557	0.490184	0.629267	0.893494	-6.822
Psma4	0.0622645	2.79432	0.493603	0.626892	0.891821	-6.82027
Chkb	0.0621876	-1.3508	0.514833	0.612238	0.884344	-6.80928
Dynlt1	0.0617793	-0.785697	0.506659	0.617861	0.886706	-6.81357
Cotl1	0.0617736	3.49376	0.481443	0.635358	0.896034	-6.82637
Cd82	0.0616175	-2.57563	0.49704	0.624509	0.890098	-6.81853
Jaml	0.0616029	-1.52657	0.476713	0.638665	0.898696	-6.8287
Plcb3	0.0615857	-0.417631	0.510193	0.615427	0.885713	-6.81172
C1qb	0.0613489	1.44682	0.533326	0.599608	0.877973	-6.79934
Il16	0.0612627	-0.799038	0.508474	0.61661	0.886706	-6.81262
Cmas	0.0609386	1.11753	0.515203	0.611984	0.884344	-6.80909
Scamp3	0.0608689	-6.27414	0.38657	0.703103	0.913164	-6.86878
Cox6c	0.0608271	2.86546	0.527082	0.603858	0.880537	-6.80274
Mpc2	0.060814	-0.49545	0.510666	0.615102	0.885713	-6.81148
Zpr1	0.0607259	0.260706	0.475908	0.639229	0.898696	-6.82909
Slc9a1	0.060696	-0.626918	0.482802	0.634409	0.895744	-6.82569
Lzic	0.0605075	1.551	0.514172	0.612692	0.884354	-6.80963
Ifi204	0.0604297	1.02592	0.525846	0.604701	0.880537	-6.8034
Rasa1	0.0602099	-0.0848365	0.501838	0.621189	0.888183	-6.81606
Ldhb	0.060136	2.79271	0.435625	0.667713	0.908201	-6.84799
Abce1	0.0600443	2.5434	0.455866	0.653333	0.903436	-6.8387
Ak1	0.0600318	2.25243	0.521575	0.607619	0.881862	-6.8057
Slc7a8	0.0599936	1.37172	0.454264	0.654466	0.904036	-6.83945
Daglb	0.0599678	0.747953	0.512837	0.613609	0.88503	-6.81034
Gtpbp4	0.0599296	-2.11669	0.45567	0.653471	0.903436	-6.83879
Odr4	0.0599026	-4.2744	0.464229	0.647431	0.901359	-6.83474
Man1b1	0.0595939	-3.55592	0.504181	0.619571	0.887153	-6.81485
Grk2	0.0595819	0.035284	0.46902	0.64406	0.90038	-6.83244
Pdha1	0.0595417	2.46941	0.487403	0.631203	0.894354	-6.8234
Nfxl1	0.0591826	-2.13103	0.484056	0.633535	0.895537	-6.82507
Necap2	0.0591634	1.52198	0.469967	0.643396	0.90038	-6.83198
Sppl2a	0.0591027	-0.258219	0.421982	0.67748	0.910032	-6.85401
Ctnnb1	0.0590699	1.17904	0.480398	0.636088	0.896512	-6.82688
Gps1	0.0590337	1.3739	0.507378	0.617366	0.886706	-6.81319
Zc2hc1a	0.0590214	-1.79041	0.451189	0.656644	0.905651	-6.84088
Rsl1d1	0.0587409	0.432607	0.436149	0.667339	0.908201	-6.84775
Retsat	0.058732	-1.09433	0.489076	0.630038	0.894043	-6.82256
Ubl4a	0.0585505	-3.56774	0.43515	0.668052	0.908201	-6.8482
Gls	0.0584724	1.55989	0.426157	0.674485	0.908666	-6.85219
Asph	0.0583755	1.94255	0.43739	0.666453	0.908201	-6.84719
Mocs1	0.0582016	-1.66982	0.496699	0.624745	0.890098	-6.8187
Tlr7	0.058149	2.87889	0.463475	0.647962	0.901359	-6.8351
Ctsl	0.0578433	2.09916	0.415942	0.681823	0.910032	-6.85662
Pdhb	0.0576166	2.17261	0.487561	0.631092	0.894354	-6.82332
Myo9a	0.0576151	1.15317	0.50098	0.621782	0.888388	-6.81651
Adam8	0.0575922	1.36744	0.46174	0.649185	0.901359	-6.83592
Strn3	0.0574808	-1.66678	0.461528	0.649334	0.901359	-6.83602
Tuba4a	0.0569941	1.6285	0.448224	0.658746	0.90607	-6.84225
Bin1	0.0569924	1.86703	0.391048	0.699842	0.911894	-6.86698
Sestd1	0.05674	-2.95354	0.441894	0.663245	0.907284	-6.84515
Xpo1	0.0566874	2.68853	0.448606	0.658475	0.90607	-6.84208
Rgs14	0.0565335	-3.48378	0.396461	0.695908	0.911559	-6.86478
Poglut1	0.0560817	-0.866323	0.438809	0.665442	0.908163	-6.84655
Casp8	0.0560763	1.56179	0.468893	0.64415	0.90038	-6.8325
ATP5IF1	0.0558823	2.81613	0.420178	0.678776	0.910032	-6.8548
Mrpl21	0.0558651	-3.10269	0.41015	0.685998	0.910032	-6.85909
Mpc1	0.0556968	-2.6906	0.426584	0.674179	0.908666	-6.852
Lsm14a	0.055478	-3.3739	0.467084	0.645422	0.900969	-6.83337
Shc1	0.0554672	-2.02716	0.429683	0.671959	0.908666	-6.85063
Trim21	0.0553579	-4.17243	0.447229	0.659452	0.90607	-6.84271
Uqcrb	0.0552398	2.32812	0.466333	0.64595	0.901018	-6.83373
Gosr2	0.0550651	-0.819458	0.436862	0.66683	0.908201	-6.84743
Mrpl40	0.0550503	-1.37177	0.446689	0.659836	0.90607	-6.84296
Erbin	0.0550075	-0.513628	0.461848	0.649109	0.901359	-6.83587
Map4k4	0.0548235	-0.551243	0.430774	0.671179	0.908666	-6.85015
Ilf3	0.0547653	1.00061	0.408909	0.686894	0.910032	-6.85961
Folr2	0.0547227	0.678644	0.428034	0.67314	0.908666	-6.85136
Rab35	0.0545661	1.02489	0.458843	0.651229	0.903038	-6.83729
Ccdc22	0.0544066	2.30535	0.431995	0.670306	0.908666	-6.84961
Stk25	0.0542563	-2.94121	0.427038	0.673853	0.908666	-6.8518
Ubl7	0.0541718	-2.94614	0.400598	0.692907	0.910941	-6.86308
Ezr	0.0541611	3.51157	0.438732	0.665496	0.908163	-6.84659
Fkbp2	0.0541595	1.23277	0.468241	0.644608	0.90038	-6.83281
Sypl1	0.0541277	0.398462	0.430757	0.671191	0.908666	-6.85016
Ctnna1	0.0540721	1.70535	0.417084	0.681001	0.910032	-6.85613
Txndc12	0.0540372	1.20516	0.461606	0.649279	0.901359	-6.83599
Dpysl3	0.0539861	0.879845	0.442443	0.662854	0.907284	-6.8449
Fam49a	0.0539172	-0.48024	0.413996	0.683225	0.910032	-6.85745
Tomm70	0.0537287	1.59967	0.39656	0.695836	0.911559	-6.86474
Supt16h	0.0536575	1.25163	0.410844	0.685498	0.910032	-6.85879
IntS13	0.0536385	-5.24178	0.402284	0.691686	0.910574	-6.86238
Phgdh	0.0536206	1.89231	0.427611	0.673443	0.908666	-6.85155
Lmnb1	0.053587	2.94559	0.445285	0.660833	0.906169	-6.8436
Nenf	0.0533922	0.321949	0.411391	0.685103	0.910032	-6.85856
Mtap	0.0530038	1.55212	0.455525	0.653574	0.903436	-6.83886
Washc4	0.0529022	1.76228	0.398736	0.694257	0.910941	-6.86385
Col5a2	0.0526422	0.792863	0.426367	0.674334	0.908666	-6.8521
Tmco1	0.0525909	-0.0800516	0.425673	0.674831	0.908666	-6.8524
Hint3	0.0525574	-1.32255	0.446766	0.659781	0.90607	-6.84292
Atxn7l3b	0.0523811	-2.23568	0.399447	0.693742	0.910941	-6.86356
Tmed10	0.0522683	2.53695	0.412872	0.684035	0.910032	-6.85793
Glud1	0.0522596	4.47536	0.441129	0.663789	0.9074	-6.8455
Apeh	0.0521518	2.09764	0.436194	0.667306	0.908201	-6.84773
Elp1	0.0519717	0.210486	0.432379	0.670031	0.908666	-6.84944
Cyb5a	0.051849	2.76116	0.426385	0.674321	0.908666	-6.85209
Snx17	0.05169	0.992419	0.385548	0.703848	0.913309	-6.86919
Commd8	0.0515809	-0.219574	0.423961	0.676059	0.909374	-6.85315
Sash1	0.051371	-1.69142	0.375264	0.711362	0.916331	-6.87322
Nagk	0.0513251	1.48673	0.406718	0.688478	0.910032	-6.86053
Gpc6	0.0512734	-2.92393	0.410321	0.685875	0.910032	-6.85902
Akt1	0.0511035	-0.188221	0.393394	0.698136	0.911894	-6.86603
Jak1	0.0510182	-0.797549	0.360478	0.722219	0.922527	-6.87884
Puf60	0.0507496	0.808963	0.406108	0.688918	0.910032	-6.86079
Fhl2	0.0504725	0.94416	0.399607	0.693626	0.910941	-6.86349
Nsfl1c	0.0504582	-1.42036	0.387898	0.702135	0.913164	-6.86825
Dnajb1	0.0504066	-0.873874	0.425894	0.674673	0.908666	-6.8523
Ssna1	0.0502552	-2.38607	0.406035	0.688971	0.910032	-6.86082
Cap1	0.0502022	5.08424	0.392211	0.698996	0.911894	-6.86651
Xpo4	0.0501696	-3.51378	0.403093	0.6911	0.910548	-6.86205
Asrgl1	0.0501527	-0.995039	0.410541	0.685717	0.910032	-6.85892
Txndc17	0.0501467	1.37887	0.37824	0.709184	0.915615	-6.87207
Ywhah	0.0501344	0.998322	0.412241	0.68449	0.910032	-6.8582
Dazap1	0.0500377	0.171216	0.406382	0.68872	0.910032	-6.86067
Abca9	0.0500074	0.15936	0.418028	0.680322	0.910032	-6.85573
Itgav	0.0497195	1.68534	0.428188	0.67303	0.908666	-6.85129
Mfge8	0.0494374	1.82166	0.404503	0.690079	0.910548	-6.86146
Capza2	0.0493003	1.7771	0.404362	0.690181	0.910548	-6.86152
Npm1	0.0492837	3.94214	0.35318	0.7276	0.923402	-6.88153
Aqr	0.0492354	-2.16782	0.335206	0.740914	0.926566	-6.88793
Pcdh12	0.0492321	-1.42306	0.424593	0.675606	0.909374	-6.85287
Gm20431	0.0492087	2.25597	0.373963	0.712315	0.916662	-6.87373
Gorasp2	0.0492064	1.03142	0.357919	0.724104	0.922527	-6.87979
Psmc2	0.0490561	3.00591	0.417012	0.681053	0.910032	-6.85616
Pgam5	0.0489951	1.07043	0.392789	0.698575	0.911894	-6.86628
Ndufb5	0.0488965	1.26163	0.402629	0.691436	0.910548	-6.86224
Bloc1s1	0.0485795	-4.37171	0.355567	0.725838	0.922527	-6.88066
Tmem65	0.0485329	-1.96606	0.412996	0.683945	0.910032	-6.85788
Ctps1	0.0485005	0.558013	0.404097	0.690373	0.910548	-6.86163
Prrc1	0.0483815	1.30151	0.323705	0.749478	0.927925	-6.89185
Diablo	0.0480985	-2.35478	0.342639	0.735398	0.925982	-6.88532
Coasy	0.0480554	-0.823734	0.382336	0.706191	0.913728	-6.87046
Rftn1	0.0480349	1.25358	0.410235	0.685937	0.910032	-6.85905
Ppp2r5a	0.0478662	-1.54776	0.377601	0.709652	0.915919	-6.87232
Nucks1	0.0478412	2.82038	0.38524	0.704073	0.913309	-6.86931
Myd88	0.0477792	-2.86557	0.402899	0.691241	0.910548	-6.86213
Rpl35	0.0476923	-0.382232	0.4133	0.683726	0.910032	-6.85775
Iqgap2	0.047686	2.01064	0.359731	0.722769	0.922527	-6.87912
Ndufb9	0.0472052	0.695349	0.389262	0.701142	0.912986	-6.8677
Cyb5r4	0.0469959	-1.94685	0.378272	0.709161	0.915615	-6.87205
Hdac6	0.0469545	-1.57847	0.38369	0.705203	0.913685	-6.86992
Ankrd44	0.0469447	-0.500412	0.369226	0.715788	0.919634	-6.87555
Cpne1	0.0469398	0.959188	0.397301	0.695298	0.911559	-6.86444
Snx4	0.046787	2.11037	0.345173	0.73352	0.925982	-6.88442
Dok1	0.0467568	-0.883948	0.393657	0.697945	0.911894	-6.86593
Ppp1r8	0.0466519	-2.88845	0.358099	0.723971	0.922527	-6.87973
Man1c1	0.0466327	-1.88228	0.354969	0.726279	0.922527	-6.88088
Fam98b	0.0464475	-2.03484	0.313325	0.757235	0.931112	-6.89527
Mapre1	0.0461925	2.58653	0.346939	0.732213	0.925982	-6.88379
Chst12	0.0459989	-2.75904	0.354339	0.726744	0.922613	-6.88111
Camk1	0.0459834	2.12438	0.368893	0.716033	0.91965	-6.87567
Exoc4	0.0458959	1.70479	0.382831	0.70583	0.913685	-6.87026
Pla2g4a	0.0456471	0.398957	0.363842	0.719744	0.922173	-6.87758
Mtpn	0.0456299	1.55006	0.362998	0.720364	0.922173	-6.8779
Vcam1	0.045603	0.584636	0.39002	0.70059	0.912567	-6.8674
Gtf2b	0.0456002	-1.60525	0.298182	0.7686	0.934903	-6.90006
Uso1	0.0454306	2.44295	0.375844	0.710937	0.916082	-6.873
Cavin1	0.0454069	2.73501	0.391598	0.699442	0.911894	-6.86676
Hpgds	0.0453676	0.104396	0.358467	0.7237	0.922527	-6.87959
Palm	0.0452358	-1.69808	0.341419	0.736302	0.925982	-6.88576
Dnm1l	0.0451633	2.61338	0.376481	0.710471	0.916082	-6.87275
Kif3b	0.0451138	0.167697	0.306306	0.762496	0.934031	-6.89752
Vps35	0.045022	4.23297	0.365762	0.718332	0.921704	-6.87686
Lancl1	0.0448743	0.593711	0.382817	0.70584	0.913685	-6.87027
-	0.0446063	3.40189	0.331996	0.743301	0.926704	-6.88904
Lap3	0.0445764	2.57405	0.316298	0.755011	0.929332	-6.8943
Cln5	0.0445	1.50539	0.350503	0.729578	0.923844	-6.88251
Ccny	0.0444843	-1.11957	0.382138	0.706336	0.913728	-6.87054
Tollip	0.0444573	1.15879	0.329289	0.745316	0.926875	-6.88996
Rac2	0.0441901	1.68394	0.355312	0.726027	0.922527	-6.88075
Ostc	0.0441613	-0.339323	0.333237	0.742378	0.926704	-6.88861
Pyroxd2	0.0441448	-0.417844	0.316676	0.754728	0.929332	-6.89418
Nat2	0.0441131	-2.0104	0.332668	0.742801	0.926704	-6.8888
Rbp1	0.0441076	-3.06329	0.364187	0.71949	0.922173	-6.87745
Dtymk	0.0440223	-2.07408	0.339294	0.737878	0.925982	-6.8865
Xpot	0.0437769	-1.38644	0.379947	0.707937	0.914601	-6.8714
Pck2	0.0437427	2.11379	0.356459	0.72518	0.922527	-6.88033
Arl6ip5	0.0435262	3.04249	0.358153	0.723932	0.922527	-6.87971
Nup43	0.0433471	-1.74876	0.332404	0.742997	0.926704	-6.8889
Nedd4l	0.043058	-2.658	0.350494	0.729584	0.923844	-6.88251
Sec31a	0.0429554	3.35776	0.331161	0.743922	0.926704	-6.88932
Cd200r1	0.0429368	-0.221412	0.338021	0.738823	0.926048	-6.88695
Xpo5	0.042821	-1.40382	0.356869	0.724878	0.922527	-6.88018
Rdx	0.0425647	2.57918	0.35205	0.728435	0.923775	-6.88195
Prelp	0.0424672	2.76415	0.364559	0.719216	0.922173	-6.87731
Gm10273	0.0423018	-2.3601	0.324388	0.748968	0.927613	-6.89162
Nomo1	0.0422988	1.94688	0.317867	0.753837	0.929332	-6.89378
Dhrs7	0.0422425	0.7249	0.341817	0.736007	0.925982	-6.88561
H2-D1	0.0421758	-1.13946	0.339483	0.737738	0.925982	-6.88644
Sfxn1	0.0421139	0.558733	0.349684	0.730183	0.923899	-6.8828
Atp2a2	0.0420466	2.69764	0.350759	0.729388	0.923844	-6.88241
Mat2b	0.041957	-1.6368	0.341345	0.736357	0.925982	-6.88578
Eif4h	0.0418737	1.82934	0.30286	0.765083	0.934903	-6.8986
Hip1	0.0417281	3.34916	0.356689	0.725011	0.922527	-6.88025
Vps26a	0.041706	3.07351	0.32814	0.746171	0.926875	-6.89035
D230025D16Rik	0.0415494	-1.34637	0.290984	0.77402	0.935166	-6.90226
Fmo2	0.0413922	0.462817	0.324722	0.748719	0.927613	-6.89151
Clybl	0.0413658	-0.773357	0.35214	0.728368	0.923775	-6.88191
Ankfy1	0.0409318	2.29868	0.356934	0.72483	0.922527	-6.88016
Chmp4b	0.0409062	0.489494	0.333927	0.741865	0.926704	-6.88837
Pld3	0.0406718	2.0907	0.336973	0.739602	0.926142	-6.88731
Eif4g1	0.0406336	3.41963	0.315702	0.755456	0.929503	-6.89449
Oxsm	0.0406121	-2.22151	0.346253	0.732721	0.925982	-6.88404
Cops7a	0.0403107	0.393565	0.251108	0.804258	0.950108	-6.91345
Etfb	0.0402998	2.92464	0.310227	0.759556	0.931719	-6.89627
Cluh	0.0402278	-2.63169	0.334939	0.741112	0.926566	-6.88802
Ms4a4a	0.0401835	-0.449388	0.335512	0.740687	0.926566	-6.88782
Ubr2	0.0401644	-3.90669	0.339219	0.737934	0.925982	-6.88653
Tpi1	0.0401275	3.70597	0.318474	0.753383	0.929267	-6.89358
Tubg1	0.0399827	-0.995232	0.327899	0.746351	0.926875	-6.89043
Exosc8	0.0399233	-2.63357	0.294415	0.771435	0.935166	-6.90122
Smpdl3a	0.0397405	3.14422	0.340313	0.737123	0.925982	-6.88615
Ctsf	0.0396206	-2.49843	0.324357	0.748991	0.927613	-6.89163
Ppil2	0.039517	-2.7998	0.332281	0.743089	0.926704	-6.88894
Vps41	0.03948	0.994878	0.325618	0.748051	0.927611	-6.8912
Ptpn12	0.0394767	-0.00688961	0.31768	0.753977	0.929332	-6.89385
Fbln2	0.0394574	2.98397	0.293741	0.771943	0.935166	-6.90142
Pcbp2	0.0390238	2.03921	0.247607	0.806929	0.951098	-6.91436
Rheb	0.0389998	1.04579	0.312853	0.757589	0.931257	-6.89542
Mrps36	0.0388319	-1.85703	0.318571	0.753311	0.929267	-6.89355
Cdc37	0.0386549	2.83297	0.325002	0.74851	0.927613	-6.89141
Gm17669	0.0384915	2.02	0.304043	0.764194	0.934903	-6.89823
Cpsf6	0.0384826	0.539384	0.294041	0.771717	0.935166	-6.90133
Hm13	0.0384417	0.50794	0.300282	0.76702	0.934903	-6.89941
Psmb10	0.0384273	1.69184	0.255448	0.800951	0.948848	-6.91231
Ensa	0.0380324	-0.756554	0.279088	0.783005	0.939865	-6.90577
Lancl2	0.0379932	-0.780187	0.273651	0.787122	0.941497	-6.90732
Cd84	0.0378677	-0.528383	0.326366	0.747493	0.927502	-6.89095
Tbc1d15	0.0378634	0.299905	0.291481	0.773646	0.935166	-6.90211
Add1	0.0378528	1.34748	0.288321	0.776029	0.93559	-6.90305
Fermt2	0.0377352	1.03648	0.296905	0.76956	0.934903	-6.90045
Ube2e3	0.0377313	-3.53396	0.299539	0.767579	0.934903	-6.89964
Ap5z1	0.0373667	-2.20875	0.317172	0.754357	0.929332	-6.89401
Atp6v1e1	0.0372816	2.56394	0.289464	0.775166	0.93559	-6.90271
Hectd3	0.0371555	-1.17549	0.274288	0.786639	0.94149	-6.90714
Cnot9	0.0371345	-1.15696	0.276403	0.785037	0.941282	-6.90654
Tmod1	0.0369611	-0.435612	0.282924	0.780104	0.937767	-6.90465
Stip1	0.0369418	4.11157	0.274904	0.786172	0.941474	-6.90697
Cpt1a	0.0367128	0.839019	0.279572	0.782639	0.939833	-6.90563
Prpsap1	0.0366758	0.679898	0.316202	0.755082	0.929332	-6.89433
Rpl18	0.03616	2.61725	0.269579	0.790209	0.943761	-6.90847
Dld	0.0361174	3.35029	0.297397	0.76919	0.934903	-6.9003
Elmo1	0.0360561	2.35235	0.291926	0.77331	0.935166	-6.90197
Snrpa	0.0360478	-3.1664	0.300482	0.76687	0.934903	-6.89935
Tor1a	0.0358331	-2.50227	0.286776	0.777195	0.936277	-6.90351
Aifm2	0.0358171	-0.839517	0.300694	0.76671	0.934903	-6.89928
Dlat	0.0355533	2.59187	0.275502	0.78572	0.941474	-6.9068
Agl	0.0354718	-2.08492	0.26814	0.791301	0.944495	-6.90887
Pkn2	0.0352411	-3.84055	0.292228	0.773082	0.935166	-6.90188
Osbpl9	0.0352281	3.10631	0.296385	0.769952	0.934903	-6.90061
Smap2	0.0351127	1.63149	0.296297	0.770017	0.934903	-6.90064
Cdk7	0.0350958	-0.88297	0.29904	0.767954	0.934903	-6.89979
Sts	0.035007	1.21343	0.278908	0.783141	0.939865	-6.90582
Gpx7	0.0349845	0.15821	0.301724	0.765936	0.934903	-6.89896
Fech	0.0349114	1.01415	0.289021	0.775501	0.93559	-6.90284
Tmbim1	0.0347559	-0.876871	0.297021	0.769473	0.934903	-6.90042
Vps4a	0.0344985	0.162414	0.258449	0.798666	0.94804	-6.91151
Htt	0.0343456	0.0568227	0.239598	0.813048	0.952058	-6.91638
Cep170	0.0339422	-1.13228	0.289533	0.775114	0.93559	-6.90269
F10	0.0339359	4.12891	0.283138	0.779942	0.937767	-6.90459
Tmem19	0.0338829	-0.944951	0.259211	0.798087	0.94804	-6.91131
Acadvl	0.0338318	1.74637	0.237076	0.814978	0.952579	-6.917
Arfgap2	0.0332574	0.633838	0.288733	0.775718	0.93559	-6.90293
Ywhag	0.0331181	2.94352	0.265395	0.793386	0.945555	-6.90963
Serpinb6b	0.0329683	-0.775221	0.238404	0.813961	0.952579	-6.91668
Prkg1	0.0328975	-1.76795	0.27462	0.786388	0.941474	-6.90705
Stau1	0.0328804	-1.4398	0.266677	0.792412	0.944679	-6.90928
Ech1	0.0328237	0.574387	0.28003	0.782292	0.939833	-6.90549
Casp1	0.0327314	1.80009	0.249744	0.805299	0.950863	-6.91381
Mettl13	0.032489	-1.49092	0.283118	0.779958	0.937767	-6.90459
Nsf	0.0324509	3.5794	0.251371	0.804058	0.950108	-6.91338
Lmbrd1	0.0324399	-1.05052	0.262435	0.795634	0.94694	-6.91044
Rplp0	0.0324364	3.57198	0.263774	0.794617	0.946167	-6.91007
Nagpa	0.0324105	0.197025	0.282892	0.780129	0.937767	-6.90466
Cpne3	0.0322473	2.25465	0.237167	0.814908	0.952579	-6.91698
Dhfr	0.032188	0.636572	0.246944	0.807436	0.951397	-6.91453
Ndufa13	0.032152	0.337511	0.235632	0.816082	0.952579	-6.91736
Arhgef1	0.0319726	0.821874	0.275572	0.785666	0.941474	-6.90678
Becn1	0.0319096	-0.353066	0.274881	0.78619	0.941474	-6.90697
Raver1	0.031839	-1.25828	0.25616	0.800409	0.948848	-6.91212
Fam136a	0.0318111	0.405101	0.231273	0.819421	0.952579	-6.91841
Zyx	0.0316887	2.70367	0.236751	0.815226	0.952579	-6.91708
Clec11a	0.0314772	-3.0652	0.250898	0.804418	0.950108	-6.91351
Hspbp1	0.0313512	0.000976073	0.271446	0.788793	0.942355	-6.90795
Bin2	0.0313345	1.61897	0.262289	0.795746	0.94694	-6.91048
Gm11361	0.0312576	3.75017	0.247931	0.806682	0.951098	-6.91427
Bmp2k	0.031256	-0.220495	0.215495	0.831535	0.954917	-6.92207
Guk1	0.0312372	-0.234367	0.245052	0.80888	0.952058	-6.91501
Hnrnpa3	0.0311871	0.113406	0.259913	0.797552	0.94804	-6.91112
Eif3j1	0.0310899	1.61845	0.255874	0.800627	0.948848	-6.9122
Mapre3	0.0310877	-1.87335	0.230321	0.820151	0.952579	-6.91864
Clcn5	0.0309749	0.341579	0.258812	0.79839	0.94804	-6.91142
Rplp1	0.0309437	0.95391	0.242518	0.810816	0.952058	-6.91565
Card19	0.0308288	-3.34065	0.257605	0.799309	0.94804	-6.91174
Csde1	0.0308076	3.09775	0.236076	0.815743	0.952579	-6.91725
Rac1	0.0306189	1.04994	0.255532	0.800887	0.948848	-6.91229
C2cd2l	0.0304337	-0.70841	0.247754	0.806818	0.951098	-6.91432
Dbt	0.0304187	-0.422506	0.252971	0.802838	0.949661	-6.91297
Atp6v1g1	0.0303235	0.959694	0.220497	0.82769	0.954917	-6.92094
Tbca	0.0301376	1.05944	0.257913	0.799074	0.94804	-6.91166
Sord	0.0301303	1.69435	0.2286	0.82147	0.952876	-6.91905
Mtmr3	0.030021	-1.22193	0.230027	0.820376	0.952579	-6.91871
Crot	0.0299991	-0.80903	0.232626	0.818385	0.952579	-6.91809
Spryd7	0.0295185	-0.842328	0.22547	0.823871	0.953702	-6.91979
Ttll12	0.0293876	-0.577979	0.218877	0.828935	0.954917	-6.92131
Rad23a	0.0290757	1.28331	0.216839	0.830502	0.954917	-6.92177
Rab8b	0.0290573	0.722306	0.226613	0.822994	0.953245	-6.91952
Pkm	0.0290444	5.33765	0.210768	0.835173	0.955431	-6.92311
Rbsn	0.0290219	-0.177215	0.234478	0.816966	0.952579	-6.91764
Sugt1	0.028657	0.812799	0.237399	0.81473	0.952579	-6.91692
Top1	0.02854	1.1527	0.23647	0.815441	0.952579	-6.91715
Ppp6r3	0.0285314	-1.95145	0.23128	0.819416	0.952579	-6.91841
Cd163	0.0284961	-0.346526	0.197449	0.845442	0.959009	-6.92593
Htatip2	0.0282044	-0.866687	0.245525	0.808519	0.952058	-6.91489
Npc2	0.0281046	3.14671	0.213926	0.832742	0.954917	-6.92242
Hspa1b	0.0280293	1.2003	0.207228	0.837899	0.956216	-6.92388
Kpna4	0.0279383	0.681817	0.211592	0.834538	0.955416	-6.92293
Lyve1	0.0279378	0.573926	0.23824	0.814086	0.952579	-6.91672
Vti1b	0.0279182	-0.54749	0.215878	0.83124	0.954917	-6.92198
Abcd1	0.0278291	-1.53583	0.230126	0.820301	0.952579	-6.91869
Hmgb1	0.0277936	2.9749	0.218061	0.829562	0.954917	-6.92149
Cmpk1	0.02777	0.611556	0.206858	0.838184	0.956266	-6.92396
Ncdn	0.0277594	-1.10952	0.194063	0.848058	0.959773	-6.92662
Pggt1b	0.0277518	-1.00859	0.215691	0.831385	0.954917	-6.92202
Rcn3	0.027695	1.81831	0.20197	0.841954	0.957737	-6.925
Srrt	0.027691	1.2389	0.240199	0.812589	0.952058	-6.91623
Rpl22l1	0.0273451	-1.12051	0.230458	0.820046	0.952579	-6.91861
Sarnp	0.0269854	1.30157	0.216067	0.831095	0.954917	-6.92194
Elob	0.0268612	2.30041	0.205729	0.839055	0.956559	-6.9242
Arih1	0.0268306	0.265375	0.192877	0.848975	0.960152	-6.92686
Eps8	0.0266384	0.350974	0.218111	0.829524	0.954917	-6.92148
Pgrmc1	0.0266192	1.38498	0.214825	0.83205	0.954917	-6.92222
Il1rn	0.0264789	2.56441	0.212708	0.833679	0.954986	-6.92269
Eefsec	0.0264004	-1.25661	0.209107	0.836452	0.955686	-6.92348
Trappc5	0.0260979	0.171777	0.206098	0.83877	0.956559	-6.92412
Prmt1	0.0259451	1.07685	0.219012	0.828831	0.954917	-6.92128
Btf3l4	0.0256324	1.15174	0.192475	0.849286	0.960152	-6.92694
Gigyf2	0.0254896	-1.73356	0.195448	0.846988	0.959661	-6.92634
Alyref	0.0249523	0.368607	0.210649	0.835264	0.955431	-6.92314
Ahnak2	0.0248271	1.51348	0.202121	0.841837	0.957737	-6.92497
Dglucy	0.0247604	1.00607	0.215123	0.831821	0.954917	-6.92215
Hsp90aa1	0.0246369	4.04097	0.171216	0.865752	0.963789	-6.93095
Eps15l1	0.0243961	-3.2556	0.202595	0.841471	0.957737	-6.92487
Get4	0.024184	-2.05834	0.208692	0.836772	0.955686	-6.92357
Nudcd2	0.0240287	-0.830188	0.196161	0.846437	0.959312	-6.9262
Prcp	0.0239659	0.222725	0.187076	0.853461	0.960379	-6.928
Cds2	0.023662	-1.09947	0.167	0.869025	0.963936	-6.93169
Lcat	0.0234263	0.705971	0.183422	0.856289	0.96063	-6.92871
Metap2	0.0233848	1.48983	0.185657	0.854559	0.960491	-6.92828
Rmdn1	0.0233626	0.288301	0.184752	0.855259	0.960491	-6.92845
Vps16	0.0232149	0.599491	0.200195	0.843323	0.957737	-6.92537
Eci1	0.0230331	1.8665	0.187834	0.852874	0.960379	-6.92786
Dctn6	0.0228425	-1.75833	0.167048	0.868988	0.963936	-6.93169
Ahcyl1	0.0226956	1.8815	0.19035	0.850929	0.960271	-6.92736
Hfe	0.0226947	-1.83922	0.166905	0.869099	0.963936	-6.93171
Abcb1b	0.0226074	-2.39953	0.178675	0.859967	0.96192	-6.9296
Rpl30	0.0225486	1.55903	0.19203	0.849629	0.960152	-6.92703
Exoc6b	0.0225461	-0.345753	0.174712	0.863039	0.962645	-6.93033
Dnmt1	0.0221781	-1.87898	0.17491	0.862886	0.962645	-6.93029
Hnrnpm	0.022171	4.26883	0.186142	0.854183	0.960379	-6.92819
Hnrnph1	0.0221501	-0.617299	0.177094	0.861192	0.962237	-6.92989
Lsm12	0.0220388	-2.51459	0.163199	0.871978	0.964742	-6.93235
Ncbp1	0.0219839	-0.755998	0.178401	0.860179	0.96192	-6.92965
Cttnbp2nl	0.021938	-1.09443	0.186498	0.853908	0.960379	-6.92812
Uba5	0.0216073	-0.885734	0.17422	0.863421	0.962645	-6.93042
Tbc1d8b	0.0215537	-3.44328	0.153635	0.879417	0.967424	-6.93392
Bsg	0.0215168	-0.816671	0.184444	0.855498	0.960491	-6.92851
Sacm1l	0.0214532	2.02469	0.164469	0.870991	0.96438	-6.93213
Hsp90b1	0.0213761	5.03064	0.171355	0.865644	0.963789	-6.93093
Ppox	0.0211504	-1.67114	0.166452	0.869451	0.963936	-6.93179
Rab3d	0.0208175	-1.9436	0.16777	0.868427	0.963936	-6.93156
Rps4x	0.0206101	4.13328	0.164496	0.87097	0.96438	-6.93213
Dnajb11	0.0205792	1.83648	0.140733	0.88947	0.970826	-6.93589
Kctd21	0.0205678	-3.0122	0.17039	0.866393	0.963936	-6.9311
Mindy2	0.0205583	-2.63151	0.157069	0.876745	0.966616	-6.93337
Commd4	0.0204579	-0.652546	0.159354	0.874967	0.966616	-6.93299
Smu1	0.0204359	0.0750332	0.157706	0.876249	0.966616	-6.93326
Lamtor5	0.0201287	0.470503	0.174109	0.863507	0.962645	-6.93044
Pmm2	0.0199722	2.48528	0.153855	0.879245	0.967424	-6.93388
Hba-a1	0.0196302	3.07547	0.153159	0.879788	0.967424	-6.934
Dhrs7b	0.0195461	-0.200857	0.148503	0.883414	0.969499	-6.93472
Ptpn18	0.0193608	-4.71841	0.145803	0.885517	0.969499	-6.93514
Ppp4r3b	0.0193503	-3.1624	0.142344	0.888214	0.970473	-6.93566
Ncf4	0.0192691	2.30276	0.133503	0.895113	0.97475	-6.93692
Naa50	0.0191857	0.345782	0.165148	0.870463	0.96438	-6.93201
Alg2	0.0191449	-0.576993	0.146044	0.88533	0.969499	-6.9351
Map1a	0.0191285	1.12718	0.157726	0.876233	0.966616	-6.93326
Ppm1g	0.0190441	0.313721	0.136094	0.89309	0.973116	-6.93656
Cfl1	0.0190109	4.59688	0.152163	0.880563	0.967738	-6.93415
Psmd14	0.0189447	1.68334	0.159699	0.874699	0.966616	-6.93293
Egfr	0.0189101	-2.19207	0.121036	0.904854	0.977846	-6.93857
Purb	0.018568	1.47538	0.154141	0.879023	0.967424	-6.93384
Cops5	0.0185465	0.257546	0.148843	0.883148	0.969499	-6.93467
Pspc1	0.0185147	-0.303617	0.155765	0.877759	0.967074	-6.93358
Txnrd1	0.0184549	0.881512	0.149538	0.882607	0.969175	-6.93456
Eif3d	0.0183594	1.57688	0.160311	0.874223	0.966616	-6.93283
Mrpl10	0.0183562	-1.17648	0.146084	0.885298	0.969499	-6.93509
Mecr	0.0182215	-0.992662	0.159054	0.8752	0.966616	-6.93304
Gnai2	0.0180484	2.2095	0.138035	0.891575	0.971733	-6.93628
Magohb	0.0178779	1.09151	0.123803	0.902691	0.977846	-6.93822
Ogt	0.0178741	-0.133827	0.152186	0.880545	0.967738	-6.93415
Igfbp1	0.0178667	0.995396	0.131479	0.896693	0.975965	-6.9372
Grhpr	0.0175475	-0.845677	0.122226	0.903924	0.977846	-6.93842
Rras	0.0175016	1.97711	0.146015	0.885352	0.969499	-6.93511
Clns1a	0.0174544	-0.0673728	0.126578	0.900522	0.977846	-6.93786
Serpinb9	0.017433	0.505594	0.12866	0.898895	0.976748	-6.93758
Tmed7	0.0170788	1.78728	0.142036	0.888454	0.970473	-6.9357
Psmd3	0.0167845	1.38553	0.139803	0.890195	0.970826	-6.93603
Eif2s3x	0.0167529	1.34661	0.144186	0.886777	0.969982	-6.93538
Ptma	0.0165018	1.31292	0.140428	0.889708	0.970826	-6.93594
Osbpl11	0.016254	2.04448	0.129073	0.898572	0.976748	-6.93753
Cmtm7	0.0161211	-2.59125	0.122282	0.90388	0.977846	-6.93841
Srp72	0.0160497	1.25847	0.118865	0.906553	0.979146	-6.93884
Acyp1	0.0159478	-0.492952	0.124424	0.902205	0.977846	-6.93814
Prkcsh	0.0157263	3.393	0.110394	0.913182	0.981121	-6.93985
Carnmt1	0.0156512	-2.53022	0.121305	0.904644	0.977846	-6.93854
Tmod3	0.014962	1.72077	0.122334	0.903839	0.977846	-6.93841
Akr1b8	0.0149258	-0.553137	0.124272	0.902324	0.977846	-6.93816
Polr2e	0.014892	0.400241	0.128809	0.898779	0.976748	-6.93756
Mroh1	0.0148528	1.42022	0.123712	0.902762	0.977846	-6.93823
Mars	0.0147669	1.5616	0.116834	0.908142	0.980059	-6.93909
Enoph1	0.0147306	-2.39843	0.124605	0.902064	0.977846	-6.93811
Cog5	0.0145528	-3.3742	0.112199	0.911769	0.981121	-6.93964
Blnk	0.0144162	-1.40135	0.1086	0.914587	0.981121	-6.94005
Sh3bp1	0.0143473	-1.33258	0.108601	0.914587	0.981121	-6.94005
Lamb2	0.0142865	-1.78765	0.101712	0.919985	0.982112	-6.94081
Hspa1a	0.0142124	1.24631	0.0963847	0.924162	0.983353	-6.94136
Kank2	0.0141728	0.741013	0.111769	0.912106	0.981121	-6.93969
Nceh1	0.0138714	2.29265	0.115175	0.90944	0.980389	-6.93929
Triap1	0.0137689	-1.51052	0.103315	0.918728	0.981753	-6.94064
Ube2z	0.0136741	-0.292981	0.107135	0.915735	0.981197	-6.94022
Ap2a1	0.013613	2.22713	0.0907964	0.928546	0.983353	-6.9419
Cand1	0.0136116	4.18594	0.117658	0.907496	0.979898	-6.93899
Gsta3	0.0134203	1.75466	0.104674	0.917663	0.981753	-6.94049
Ccdc93	0.0133013	2.34263	0.10861	0.91458	0.981121	-6.94005
Tap1	0.0131416	0.42069	0.108647	0.914551	0.981121	-6.94005
Srgap2	0.0129731	1.28777	0.091222	0.928212	0.983353	-6.94186
Fah	0.0126786	1.53067	0.106924	0.9159	0.981197	-6.94024
Slc25a24	0.0125265	2.81211	0.10231	0.919516	0.981877	-6.94074
Prkcb	0.0124666	-1.43973	0.0999977	0.921329	0.98275	-6.94099
Sec22b	0.0123201	0.856694	0.107022	0.915824	0.981197	-6.94023
Dctn2	0.0122966	2.7877	0.103131	0.918872	0.981753	-6.94066
Ndufb10	0.0122156	1.10407	0.0904727	0.9288	0.983353	-6.94193
Vps35l	0.0121981	2.61349	0.102775	0.919151	0.981753	-6.94069
Myg1	0.0121153	0.111204	0.0889762	0.929974	0.983353	-6.94207
Arf6	0.0120167	0.9347	0.0864363	0.931968	0.983353	-6.9423
Pafah1b2	0.0118322	2.07946	0.0949005	0.925326	0.983353	-6.9415
Gfer	0.0117514	-2.78773	0.0940216	0.926015	0.983353	-6.94159
Slc35a4	0.0115997	-2.03168	0.0863187	0.93206	0.983353	-6.94231
Snx1	0.011472	2.57924	0.0942726	0.925818	0.983353	-6.94156
Hist1h1d	0.0114364	2.99573	0.0910582	0.92834	0.983353	-6.94187
Osbpl2	0.0112576	-1.31178	0.088731	0.930167	0.983353	-6.94209
Kxd1	0.0112345	1.00991	0.0877178	0.930962	0.983353	-6.94218
Ppp2r5c	0.0111153	-3.49794	0.0916703	0.92786	0.983353	-6.94182
Golga4	0.011051	-1.56824	0.089215	0.929787	0.983353	-6.94205
Rpia	0.0110405	-5.59822	0.0930098	0.926809	0.983353	-6.94169
Rps27a	0.010998	0.106843	0.0892385	0.929768	0.983353	-6.94204
Clta	0.0109591	2.94173	0.0782489	0.938397	0.984627	-6.943
Fadd	0.0109482	-0.34572	0.0950162	0.925235	0.983353	-6.94149
Scrib	0.0109168	-2.8947	0.0868675	0.931629	0.983353	-6.94226
Pgs1	0.01083	-2.61655	0.0825017	0.935057	0.984532	-6.94265
Rabep1	0.0106931	-1.44406	0.0877797	0.930913	0.983353	-6.94218
Anxa7	0.0106907	3.41263	0.0783939	0.938283	0.984627	-6.94299
Exoc8	0.0105542	0.0408116	0.086274	0.932095	0.983353	-6.94231
Cyr61	0.0105533	-0.881109	0.0775689	0.938932	0.984627	-6.94306
Zc3h14	0.0103946	-3.24435	0.0855427	0.932669	0.983696	-6.94238
Pnpt1	0.0103708	-1.0192	0.0828144	0.934811	0.984532	-6.94262
Ube2m	0.0103118	1.85624	0.0863772	0.932014	0.983353	-6.94231
Snrnp70	0.0102348	0.652799	0.0814424	0.935889	0.984627	-6.94274
Pip5k1c	0.0100377	0.189145	0.0768727	0.939479	0.984627	-6.94311
Cd74	0.00979473	-1.75693	0.0808656	0.936342	0.984627	-6.94278
Rmdn3	0.00964907	-1.36151	0.0769518	0.939416	0.984627	-6.94311
Paip1	0.00956557	-1.05635	0.0833579	0.934385	0.984532	-6.94257
Rap2c	0.0095543	-2.08678	0.076813	0.939525	0.984627	-6.94312
Trappc2l	0.00944856	-2.51548	0.0733876	0.942217	0.985074	-6.94338
Ppfia1	0.00938271	-2.50236	0.075746	0.940364	0.984868	-6.9432
Cc2d1b	0.00914408	0.576363	0.0683891	0.946146	0.986242	-6.94375
Gfm1	0.0090409	-1.14929	0.0596574	0.953013	0.988273	-6.94433
Cadm1	0.00902722	-3.38475	0.0662583	0.947821	0.98661	-6.9439
Gp49a	0.00897823	-3.97581	0.0705115	0.944478	0.985783	-6.9436
Vps33a	0.00893586	0.312849	0.0735691	0.942074	0.985074	-6.94337
Atg16l1	0.00892574	-1.50731	0.0678596	0.946562	0.986242	-6.94379
Tra2b	0.00872493	0.118672	0.069448	0.945314	0.985783	-6.94368
Srsf3	0.00842271	2.71103	0.0620697	0.951115	0.987601	-6.94418
Dctn1	0.00841659	2.90252	0.0573849	0.954801	0.988323	-6.94447
Inpp5d	0.00831681	2.35541	0.0523845	0.958735	0.988484	-6.94476
Rbm14	0.00816219	0.824628	0.0632895	0.950156	0.987383	-6.9441
Ppp6r1	0.0081092	-0.558367	0.0654838	0.94843	0.986802	-6.94395
Uba2	0.00792578	1.39101	0.0624361	0.950827	0.987601	-6.94416
Gss	0.00781507	0.447858	0.0671217	0.947142	0.986586	-6.94384
Mrpl24	0.00777361	-3.33049	0.0573329	0.954841	0.988323	-6.94448
Txn	0.00776645	4.0312	0.0559718	0.955912	0.988323	-6.94456
Mcmbp	0.00767628	-0.697771	0.0661396	0.947915	0.98661	-6.94391
Kdelc1	0.00767238	-2.2048	0.0634559	0.950025	0.987383	-6.94409
Sec24b	0.0076342	0.615672	0.0606738	0.952213	0.987703	-6.94427
Rnps1	0.00756851	-0.542682	0.0585117	0.953914	0.988323	-6.9444
Pygb	0.00726486	1.83558	0.0492928	0.961168	0.98889	-6.94492
Ddx21	0.00716874	-0.364007	0.0623103	0.950926	0.987601	-6.94417
Tm9sf3	0.00702227	0.918652	0.0530209	0.958234	0.988484	-6.94472
Cbx5	0.00690531	-3.69054	0.0579937	0.954322	0.988323	-6.94444
Hprt1	0.00682335	2.64963	0.0551455	0.956563	0.988323	-6.9446
Snap23	0.00675942	0.63147	0.0561848	0.955745	0.988323	-6.94454
Afg3l2	0.00669816	-0.390147	0.0557883	0.956057	0.988323	-6.94457
Tbce	0.0065848	-2.76177	0.0556191	0.95619	0.988323	-6.94458
Epb41l2	0.00657101	3.1217	0.05413	0.957362	0.988458	-6.94466
Dhx15	0.00656243	2.37147	0.051758	0.959228	0.988484	-6.94479
Sdha	0.00656059	3.67726	0.0561262	0.955791	0.988323	-6.94455
Rufy2	0.00637597	-1.82118	0.0516964	0.959277	0.988484	-6.94479
Nif3l1	0.00631648	-1.10276	0.0544469	0.957112	0.988458	-6.94464
Nup54	0.00623236	-0.474906	0.0525485	0.958606	0.988484	-6.94475
Wdr91	0.00597573	0.99035	0.0384613	0.969696	0.992294	-6.94541
Rhoc	0.00583669	-0.262374	0.0487253	0.961615	0.98889	-6.94495
Timm9	0.00581844	-1.56985	0.0454347	0.964205	0.990008	-6.94511
Tcirg1	0.00565642	2.8099	0.0478415	0.962311	0.98909	-6.94499
Adssl1	0.00563627	0.495972	0.0375622	0.970404	0.992305	-6.94545
Itpr3	0.0055219	-2.76874	0.0386822	0.969522	0.992294	-6.94541
Ptpn11	0.00548154	0.813007	0.0436677	0.965597	0.990921	-6.94519
Mmgt1	0.00547251	-1.62408	0.0406698	0.967957	0.992056	-6.94532
Anp32e	0.005398	-0.423063	0.0419962	0.966913	0.991499	-6.94527
Dhrsx	0.0052784	-2.37797	0.0455483	0.964116	0.990008	-6.94511
Irak3	0.00511849	-1.3948	0.0374907	0.970461	0.992305	-6.94545
Phax	0.00507465	-2.59861	0.0369725	0.970869	0.99245	-6.94547
MINDY3	0.0048889	-2.56313	0.0375967	0.970377	0.992305	-6.94545
Rab3il1	0.00486968	-2.09543	0.0420167	0.966896	0.991499	-6.94527
Adpgk	0.00476455	-1.36972	0.0402302	0.968303	0.992153	-6.94534
Pawr	0.00467914	0.634738	0.0392407	0.969082	0.992294	-6.94538
Sncg	0.0042324	-1.57186	0.0351025	0.972341	0.993457	-6.94554
Mthfd1l	0.00396953	1.222	0.0324556	0.974426	0.994194	-6.94564
2020-09-05	0.00393319	-0.242506	0.0298664	0.976466	0.995001	-6.94572
Mcm3	0.00388989	0.440335	0.0301497	0.976243	0.995001	-6.94571
Fus	0.00375697	1.13912	0.0322707	0.974572	0.994194	-6.94564
Nop58	0.00344179	-1.60312	0.0295256	0.976734	0.995001	-6.94573
Npepl1	0.00332483	0.232099	0.0262519	0.979313	0.99569	-6.94583
Szrd1	0.00332272	-0.0292505	0.0240366	0.981058	0.996183	-6.94588
Nup205	0.0032898	1.43246	0.0285807	0.977479	0.995001	-6.94576
Ybx3	0.00314355	-1.69886	0.0216054	0.982974	0.996769	-6.94594
Isyna1	0.00303241	1.22322	0.0254528	0.979943	0.995972	-6.94585
Coq8b	0.0028604	-1.30774	0.0241268	0.980987	0.996183	-6.94588
Rfc2	0.00284269	-3.12061	0.0244543	0.980729	0.996183	-6.94587
Prmt5	0.00282485	-1.90499	0.0205664	0.983793	0.996769	-6.94596
Hsdl1	0.00273116	-2.06554	0.0222931	0.982432	0.996769	-6.94593
Cltb	0.00267431	2.44417	0.0226579	0.982145	0.996769	-6.94592
Psmd1	0.00264801	3.14164	0.0212281	0.983271	0.996769	-6.94595
C5ar1	0.00256929	-0.450388	0.0209777	0.983469	0.996769	-6.94596
Hmox1	0.00255287	2.28302	0.018899	0.985106	0.997081	-6.946
Pdxdc1	0.00230796	1.6251	0.0179601	0.985846	0.997279	-6.94602
Slc25a13	0.0022416	-0.733341	0.0177972	0.985975	0.997279	-6.94602
Iigp1	0.00219318	0.216919	0.0161505	0.987272	0.997402	-6.94605
Copb1	0.00216924	3.67007	0.0172225	0.986428	0.997279	-6.94603
Ldha	0.00215542	4.86077	0.0187511	0.985223	0.997081	-6.946
Slc43a2	0.00210505	1.21522	0.016107	0.987306	0.997402	-6.94605
Sirt2	0.00181594	1.43263	0.0152798	0.987958	0.99755	-6.94606
Alg5	0.00150521	0.123659	0.0101986	0.991963	0.998532	-6.94613
Mapk1	0.00146382	1.91923	0.0106113	0.991637	0.998532	-6.94613
Srsf6	0.00130116	0.445739	0.0112586	0.991127	0.998532	-6.94612
Gpi	0.00127156	3.82738	0.0104851	0.991737	0.998532	-6.94613
Zadh2	0.00120905	-0.836793	0.00921826	0.992735	0.999055	-6.94614
Mrpl46	0.00100787	-1.14086	0.0085558	0.993257	0.99916	-6.94615
Sh3glb1	0.00097397	1.60114	0.00784329	0.993819	0.99916	-6.94615
Impa1	0.000972388	2.15562	0.00785625	0.993808	0.99916	-6.94615
Ubfd1	0.000959759	-0.213938	0.00694321	0.994528	0.99916	-6.94616
Apoo	0.000925258	-1.51036	0.00669431	0.994724	0.99916	-6.94616
Cnih4	0.000876433	-3.67233	0.00711815	0.99439	0.99916	-6.94616
Rps24	0.00062456	2.25321	0.00498066	0.996075	0.999597	-6.94617
Hdgfl2	0.000597657	0.154174	0.0040095	0.99684	0.999597	-6.94618
Cpne2	0.000496613	-0.508086	0.0040346	0.99682	0.999597	-6.94618
Rbm47	0.000397425	-1.97197	0.00321096	0.997469	0.999597	-6.94618
Golph3l	0.000374339	-1.22875	0.00292333	0.997696	0.999597	-6.94618
Ppp4c	0.000299495	-1.75827	0.00243641	0.99808	0.999597	-6.94618
Dbnl	4.42e-05	2.92904	0.000347176	0.999726	0.999861	-6.94618
Arfip1	2.11e-05	0.131852	0.00017603	0.999861	0.999861	-6.94618
Vasp	-4.56e-05	1.54579	-0.000381272	0.9997	0.999861	-6.94618
Vrk1	-0.000104825	-0.32309	-0.000867958	0.999316	0.999861	-6.94618
Wdr1	-0.000198665	5.19737	-0.00161003	0.998731	0.999743	-6.94618
Fuca1	-0.000277074	-2.42902	-0.00182985	0.998558	0.999743	-6.94618
Bag6	-0.000378124	0.738612	-0.00272131	0.997855	0.999597	-6.94618
Iah1	-0.0003915	-0.500151	-0.00329771	0.997401	0.999597	-6.94618
Plxna1	-0.000394932	-1.82071	-0.00272834	0.99785	0.999597	-6.94618
Actl6a	-0.000461378	-0.765505	-0.00366807	0.997109	0.999597	-6.94618
Mybbp1a	-0.000532605	0.759213	-0.00443569	0.996504	0.999597	-6.94617
Trnt1	-0.000764617	0.771555	-0.00651969	0.994862	0.99916	-6.94616
Rbbp4	-0.00104668	0.249457	-0.00725914	0.994279	0.99916	-6.94616
Ndufb7	-0.00128279	0.684241	-0.0104558	0.99176	0.998532	-6.94613
Ankrd13a	-0.00143415	-0.878935	-0.0118017	0.990699	0.998532	-6.94611
Atp1b3	-0.00144666	2.14037	-0.0125519	0.990108	0.998445	-6.9461
Tagln2	-0.00145167	2.64307	-0.0121478	0.990426	0.998512	-6.94611
Stx4	-0.0016912	-0.39697	-0.0137215	0.989186	0.997953	-6.94609
Tmx3	-0.00171709	1.15995	-0.0143147	0.988719	0.997808	-6.94608
Rab7b	-0.00177186	-3.38525	-0.0134919	0.989367	0.997953	-6.94609
Psma5	-0.00192835	2.10452	-0.0154714	0.987807	0.99755	-6.94606
Sod1	-0.00202973	2.3696	-0.0174599	0.98624	0.997279	-6.94603
Clptm1l	-0.00203814	-0.681613	-0.0146857	0.988427	0.997768	-6.94607
Acot2	-0.00232064	-1.55693	-0.0192966	0.984793	0.997081	-6.94599
Gpx3	-0.00242128	-3.34427	-0.0204227	0.983906	0.996769	-6.94597
Ndufs2	-0.00257912	0.993393	-0.0167497	0.9868	0.9974	-6.94604
Nucb2	-0.00264673	1.48517	-0.0191104	0.98494	0.997081	-6.94599
Bag5	-0.00269396	-0.346258	-0.0216552	0.982935	0.996769	-6.94594
Gmps	-0.00293521	0.634362	-0.0224757	0.982288	0.996769	-6.94592
Ric8a	-0.00307965	-1.49944	-0.0252602	0.980094	0.995972	-6.94585
Abcc1	-0.00327238	0.0139948	-0.028071	0.97788	0.995001	-6.94577
Ide	-0.00337766	1.42961	-0.0267289	0.978937	0.995594	-6.94581
Psen1	-0.0033902	-0.919344	-0.0282594	0.977732	0.995001	-6.94577
Ccdc115	-0.0034707	1.27496	-0.0266907	0.978967	0.995594	-6.94581
Qki	-0.00347983	0.144609	-0.0289121	0.977217	0.995001	-6.94575
Mcub	-0.00366942	-2.66929	-0.0301522	0.976241	0.995001	-6.94571
Aldh4a1	-0.00367411	0.281297	-0.0290494	0.977109	0.995001	-6.94575
Impdh1	-0.0036885	-4.4979	-0.0307565	0.975765	0.995001	-6.94569
Apbb1ip	-0.00393794	1.76301	-0.0329762	0.974016	0.99414	-6.94562
Atad1	-0.0039648	0.145045	-0.033443	0.973648	0.994022	-6.9456
Serpinb8	-0.00442886	-0.0869385	-0.0385209	0.969649	0.992294	-6.94541
Mccc2	-0.00445584	-0.44198	-0.0336581	0.973479	0.994022	-6.9456
Itsn1	-0.00472268	2.58488	-0.0345276	0.972794	0.993663	-6.94556
Hspa9	-0.00519598	4.51125	-0.0389775	0.96929	0.992294	-6.94539
Snrpg	-0.00525171	1.13889	-0.0366737	0.971104	0.99245	-6.94548
Cacybp	-0.00525304	1.60744	-0.0445524	0.9649	0.990464	-6.94515
Anxa6	-0.00536939	-3.15562	-0.0429328	0.966175	0.991258	-6.94523
Mtco2	-0.00542273	1.46449	-0.0407476	0.967896	0.992056	-6.94532
Gars	-0.00552233	3.06917	-0.0480196	0.962171	0.98909	-6.94499
Eif5	-0.00566744	1.27264	-0.0489932	0.961404	0.98889	-6.94494
Mrpl47	-0.0057826	-2.48689	-0.0470699	0.962918	0.989457	-6.94503
Hmox2	-0.00581442	2.34307	-0.0463559	0.96348	0.989777	-6.94507
Metap1	-0.00582168	-0.102117	-0.049976	0.960631	0.98889	-6.94489
Rps6ka3	-0.00616951	0.496117	-0.0524862	0.958655	0.988484	-6.94475
Syk	-0.00635515	2.25285	-0.0539104	0.957534	0.988458	-6.94467
Sh3gl1	-0.00636117	1.97299	-0.0537076	0.957694	0.988458	-6.94468
Scfd1	-0.00643711	1.18938	-0.0505655	0.960167	0.98889	-6.94485
Mon2	-0.00658453	0.363379	-0.0551551	0.956555	0.988323	-6.9446
Atp6v1h	-0.00669298	0.346477	-0.0496643	0.960876	0.98889	-6.9449
Nln	-0.00685991	0.72695	-0.0562053	0.955729	0.988323	-6.94454
Slc27a4	-0.00727375	-2.92218	-0.0567322	0.955314	0.988323	-6.94451
Oas3	-0.0073536	-1.87938	-0.0514511	0.95947	0.988484	-6.94481
Uba6	-0.00739428	1.92159	-0.0587564	0.953722	0.988323	-6.94439
Ube2k	-0.00753885	0.561028	-0.0490537	0.961357	0.98889	-6.94493
Vps25	-0.00813105	-0.890201	-0.0695405	0.945241	0.985783	-6.94367
Pld4	-0.00835001	1.66645	-0.0610973	0.95188	0.987703	-6.94424
Abhd4	-0.0084129	-3.32115	-0.0649525	0.948848	0.986802	-6.94399
Gys1	-0.00850434	-0.558872	-0.0738346	0.941866	0.985074	-6.94335
Tor1aip2	-0.00854429	-1.83056	-0.0607335	0.952166	0.987703	-6.94427
Pea15	-0.00865637	1.33988	-0.0721393	0.943198	0.985074	-6.94348
Dctn3	-0.00865951	0.543762	-0.0693717	0.945374	0.985783	-6.94368
Ugp2	-0.00875163	1.26048	-0.0652107	0.948645	0.986802	-6.94397
Trmt2a	-0.00881472	-2.41587	-0.071496	0.943704	0.985341	-6.94353
Nap1l4	-0.00901085	0.593689	-0.0731731	0.942386	0.985074	-6.9434
Ncln	-0.0090156	0.741881	-0.0777168	0.938815	0.984627	-6.94304
Flnc	-0.00904183	4.04754	-0.0681404	0.946342	0.986242	-6.94377
Prps1	-0.00908058	-2.42271	-0.0726062	0.942831	0.985074	-6.94344
Vamp7	-0.00913411	-0.633745	-0.0766019	0.939691	0.984627	-6.94313
Hdac1	-0.00914281	-0.0949517	-0.076919	0.939442	0.984627	-6.94311
Naca	-0.00914497	0.706106	-0.0664623	0.947661	0.98661	-6.94389
Appl1	-0.00924256	0.660898	-0.0784439	0.938244	0.984627	-6.94299
Gnl1	-0.00938201	-2.32298	-0.0790246	0.937788	0.984627	-6.94294
Kpna6	-0.00939664	-0.695935	-0.0724499	0.942954	0.985074	-6.94346
Cdc42	-0.00940345	3.83501	-0.0806243	0.936532	0.984627	-6.94281
Ifit2	-0.00941654	-3.77286	-0.0637769	0.949773	0.987383	-6.94407
Cdh2	-0.00962639	-0.0218564	-0.0818148	0.935596	0.984627	-6.9427
Rpl22	-0.00964734	-0.198376	-0.069744	0.945081	0.985783	-6.94366
[truncated: 1,953 more rows]
